# Supplementary material for: Boron Lewis Acid Catalysis Enables the Direct Cyanation of Benzyl Alcohols by Means of Isonitrile as Cyanide Source
Source: MDPI journal article supplement (doi:10.3390/molecules28052174), 2023-02-26
Supplement: s1 [file s1]

## Supporting Information

### **Boron Lewis Acid Catalysis Enables the Direct Cyanation of Benzyl Alcohols by means of Isonitrile as Cyanide Source**

**Tong-Tong Xu, Jin-Lan Zhou, Guang-Yuan Cong, Jiang-Yi-Hui Sheng,  
Shi-Qi Wang, Yating Ma, and Jian-Jun Feng\***

*State Key Laboratory of Chemo/Biosensing and Chemometrics, Advanced Catalytic Engineering Research Center of the Ministry of Education, College of Chemistry and Chemical Engineering, Hunan University, Changsha, Hunan 410082, P. R. China*

*jianjunfeng@hnu.edu.cn*

## NMR Spectra

### $^1\text{H}$ and $^{13}\text{C}$ NMR Spectra for Compound 3a:

$^1\text{H}$  NMR (400 MHz,  $\text{CDCl}_3$ )

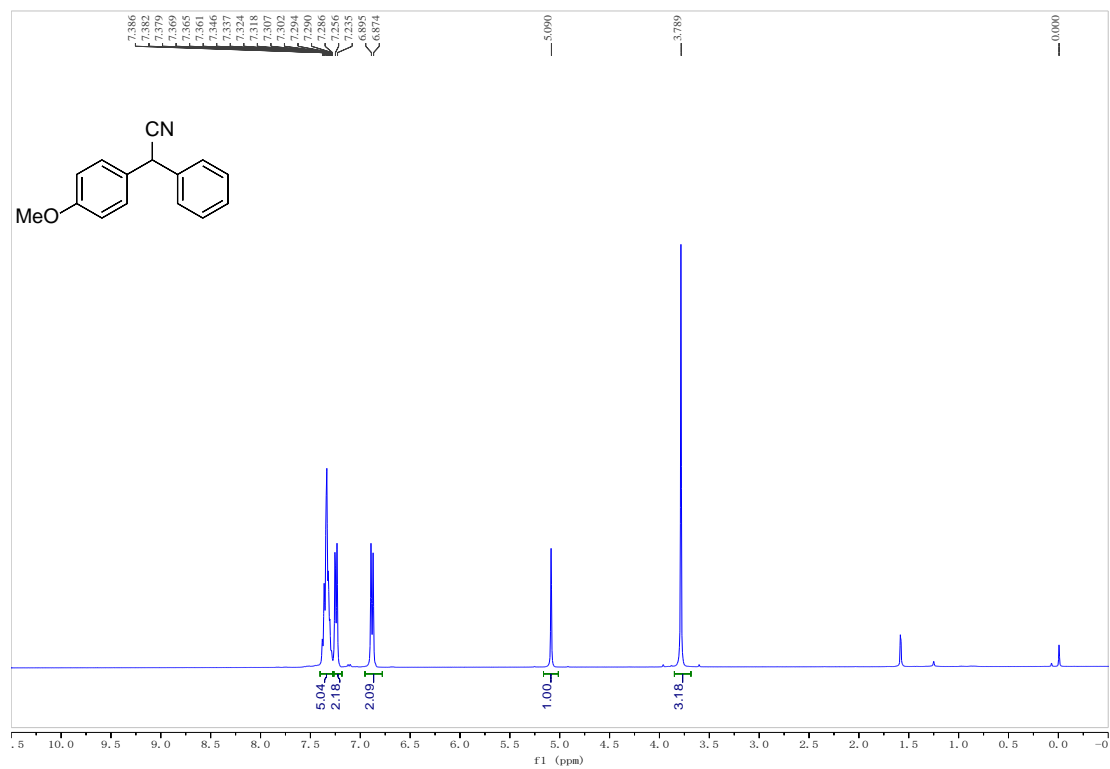

$^{13}\text{C}$  NMR (100 MHz,  $\text{CDCl}_3$ )

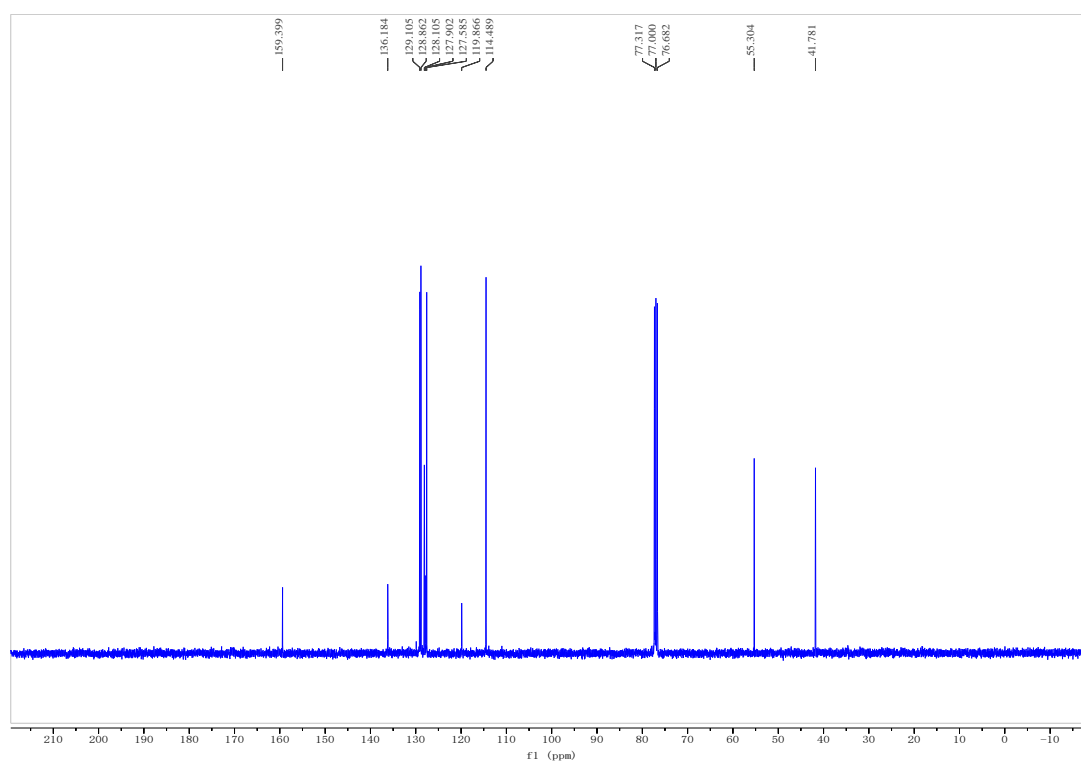

**$^1\text{H}$  and  $^{13}\text{C}$  NMR Spectra for Compound 3b:** $^1\text{H}$  NMR (400 MHz,  $\text{CDCl}_3$ )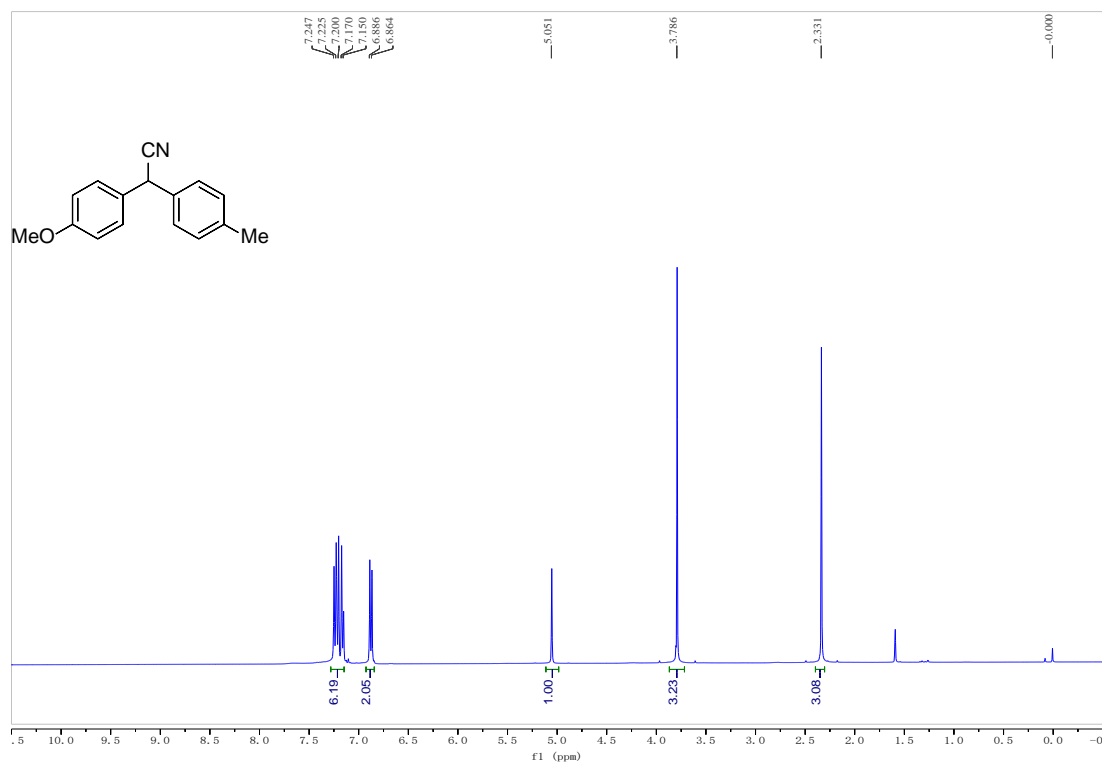 $^{13}\text{C}$  NMR (100 MHz,  $\text{CDCl}_3$ )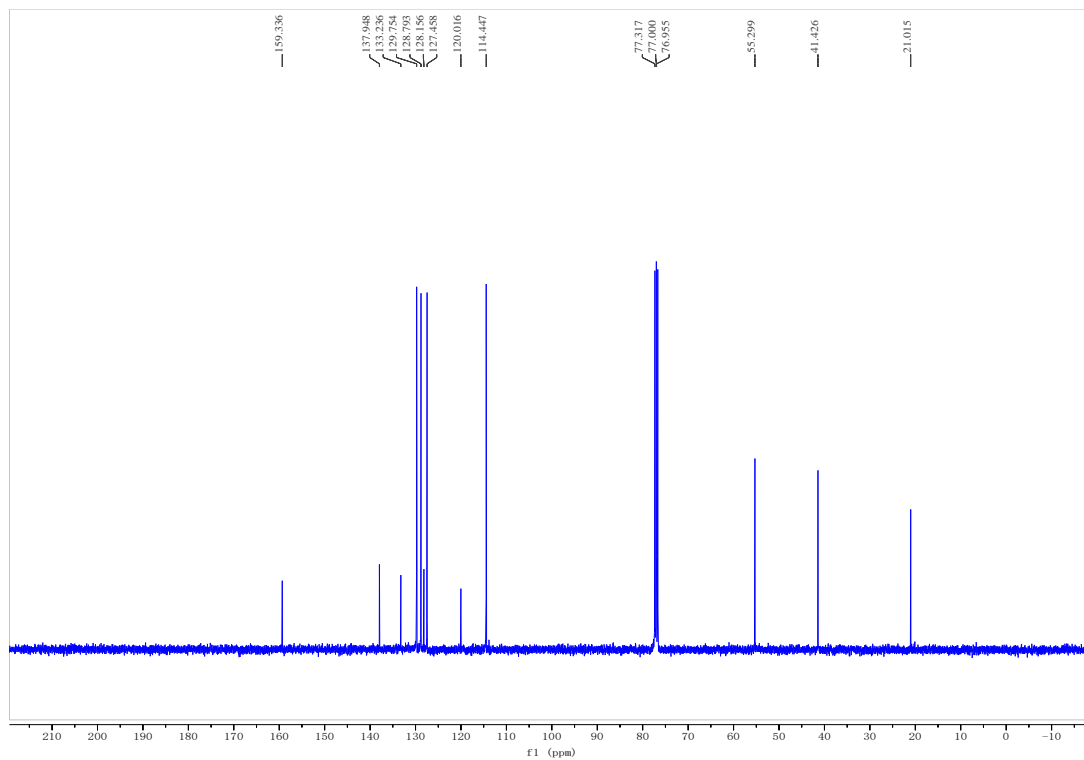

**$^1\text{H}$  and  $^{13}\text{C}$  NMR Spectra for Compound 3c:** $^1\text{H}$  NMR (400 MHz,  $\text{CDCl}_3$ )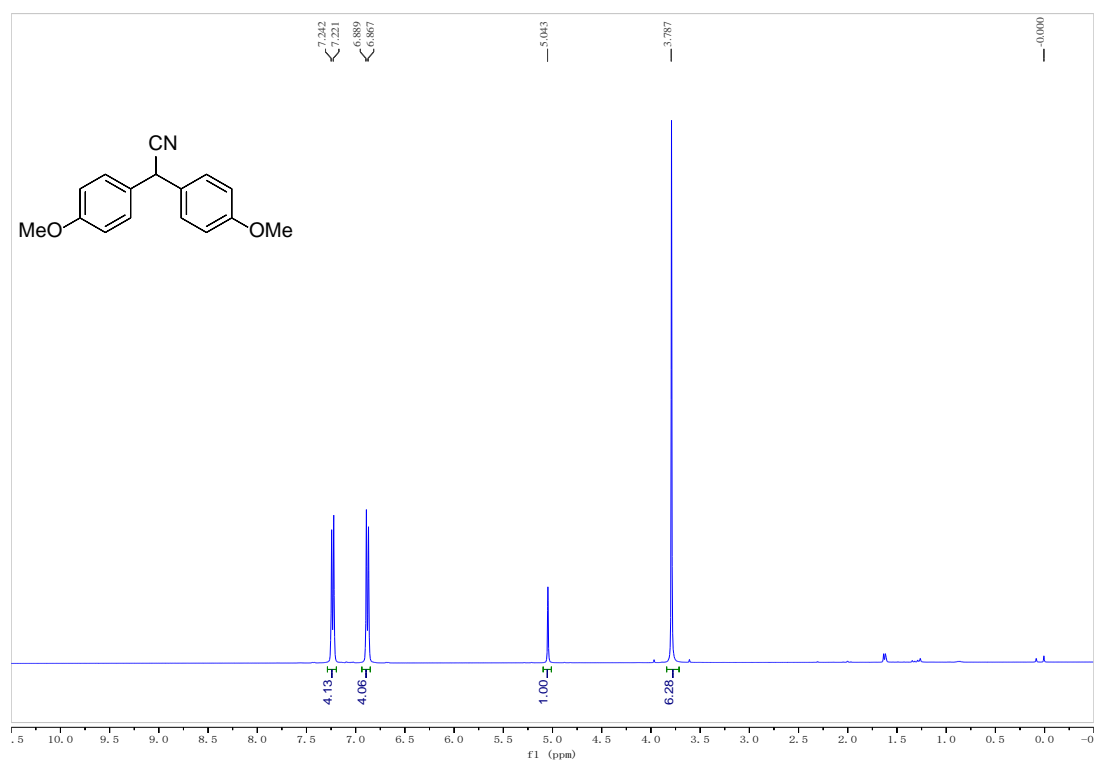 $^{13}\text{C}$  NMR (100 MHz,  $\text{CDCl}_3$ )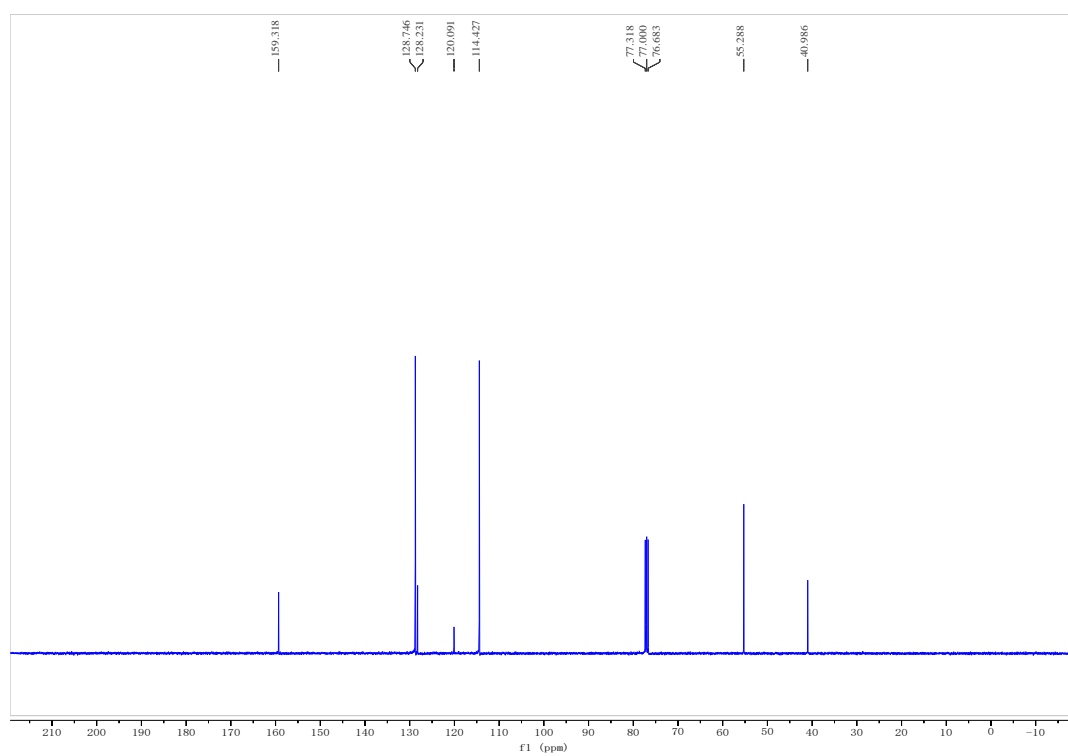

**$^1\text{H}$  and  $^{13}\text{C}$  NMR Spectra for Compound 3d:** $^1\text{H}$  NMR (400 MHz,  $\text{CDCl}_3$ )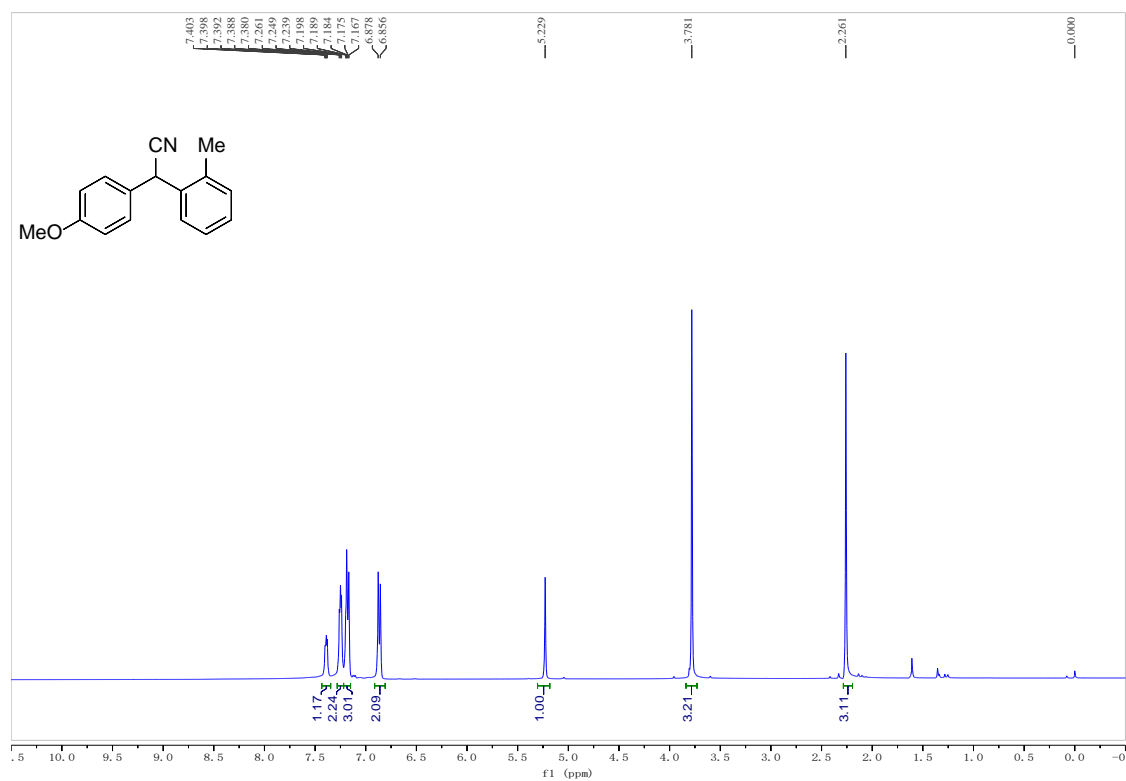 $^{13}\text{C}$  NMR (100 MHz,  $\text{CDCl}_3$ )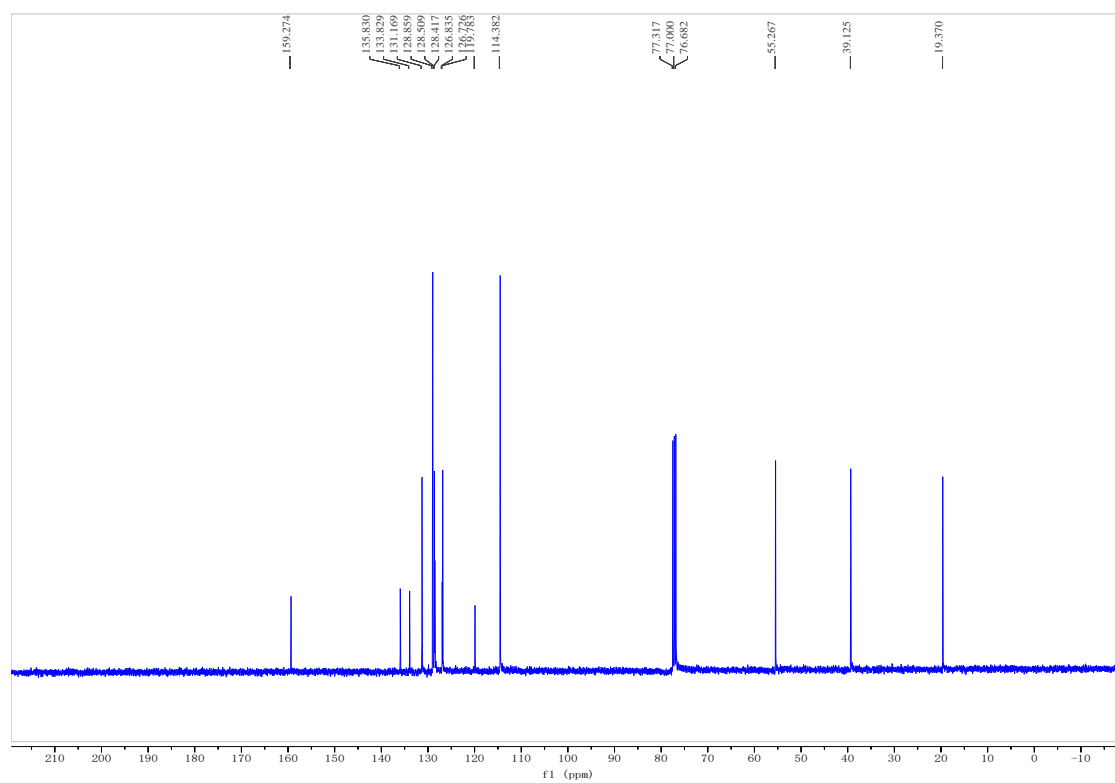

**$^1\text{H}$  and  $^{13}\text{C}$  NMR Spectra for Compound 3e:** $^1\text{H}$  NMR (400 MHz,  $\text{CDCl}_3$ )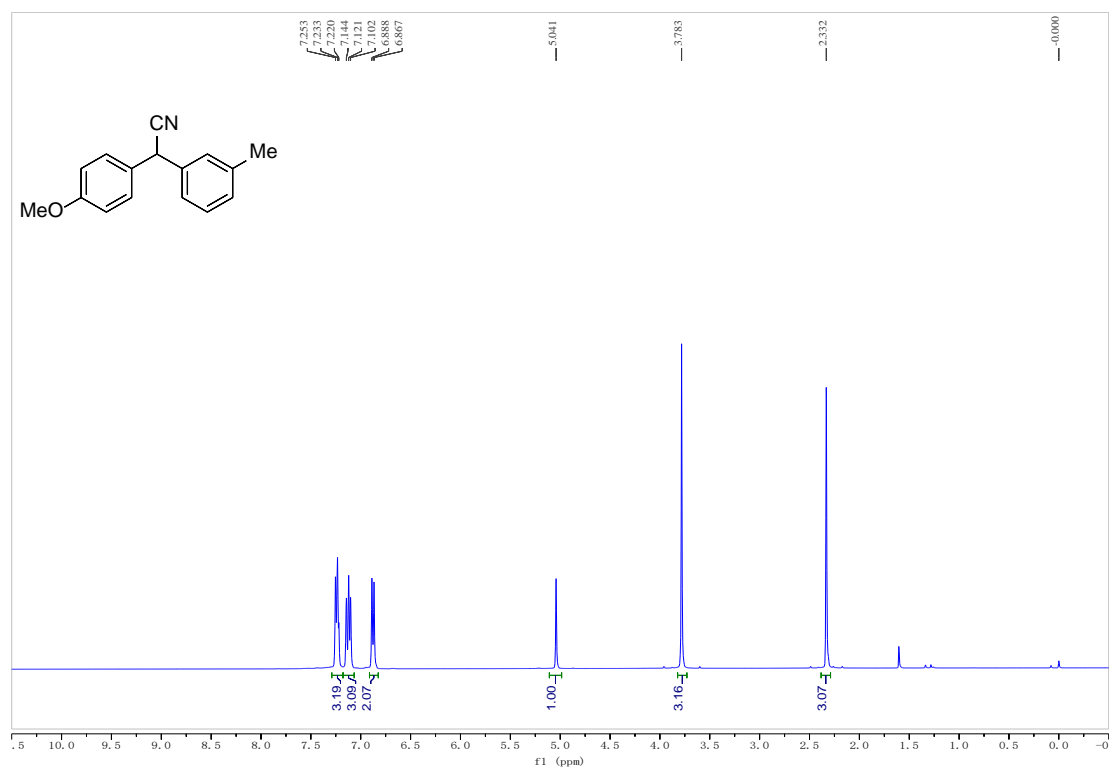 $^{13}\text{C}$  NMR (100 MHz,  $\text{CDCl}_3$ )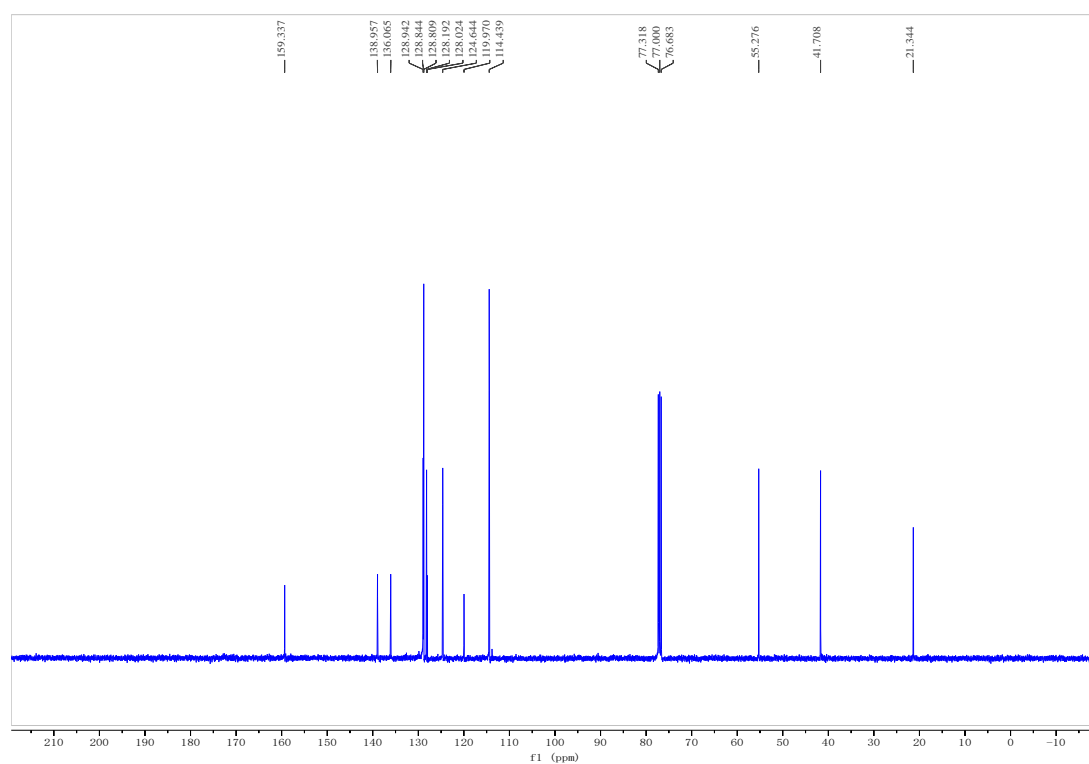

**$^1\text{H}$  and  $^{13}\text{C}$  NMR Spectra for Compound 3f:** $^1\text{H}$  NMR (400 MHz,  $\text{CDCl}_3$ )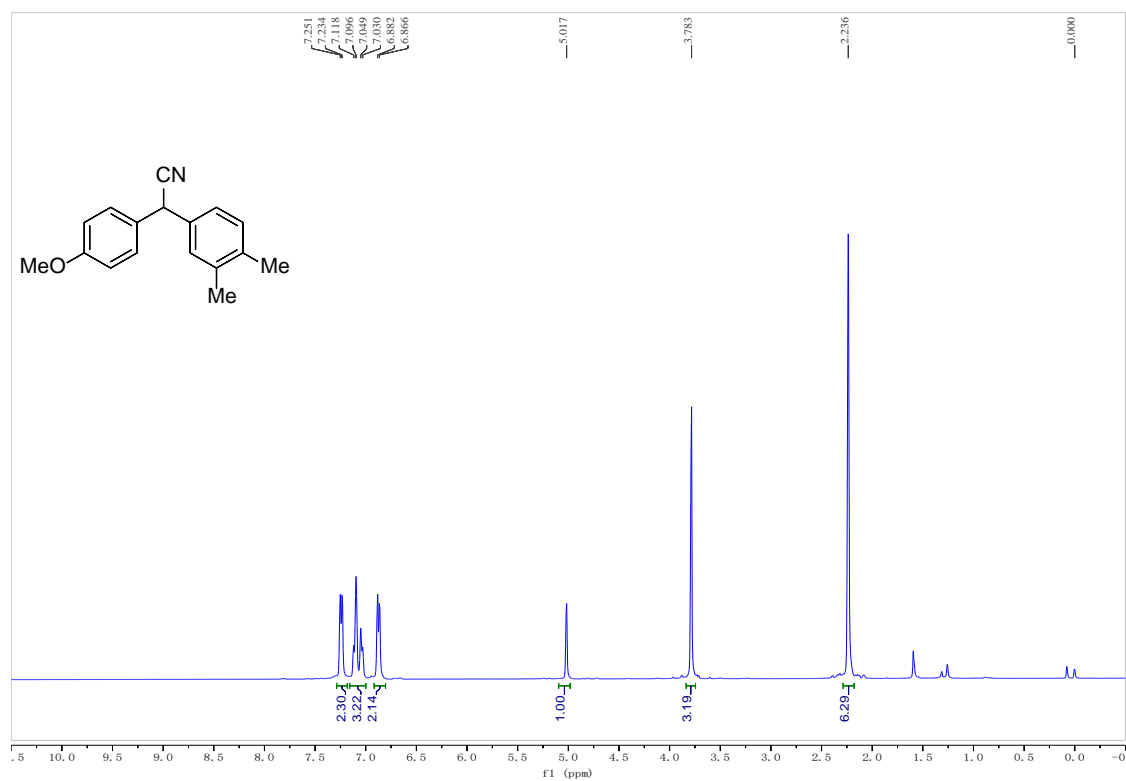 $^{13}\text{C}$  NMR (100 MHz,  $\text{CDCl}_3$ )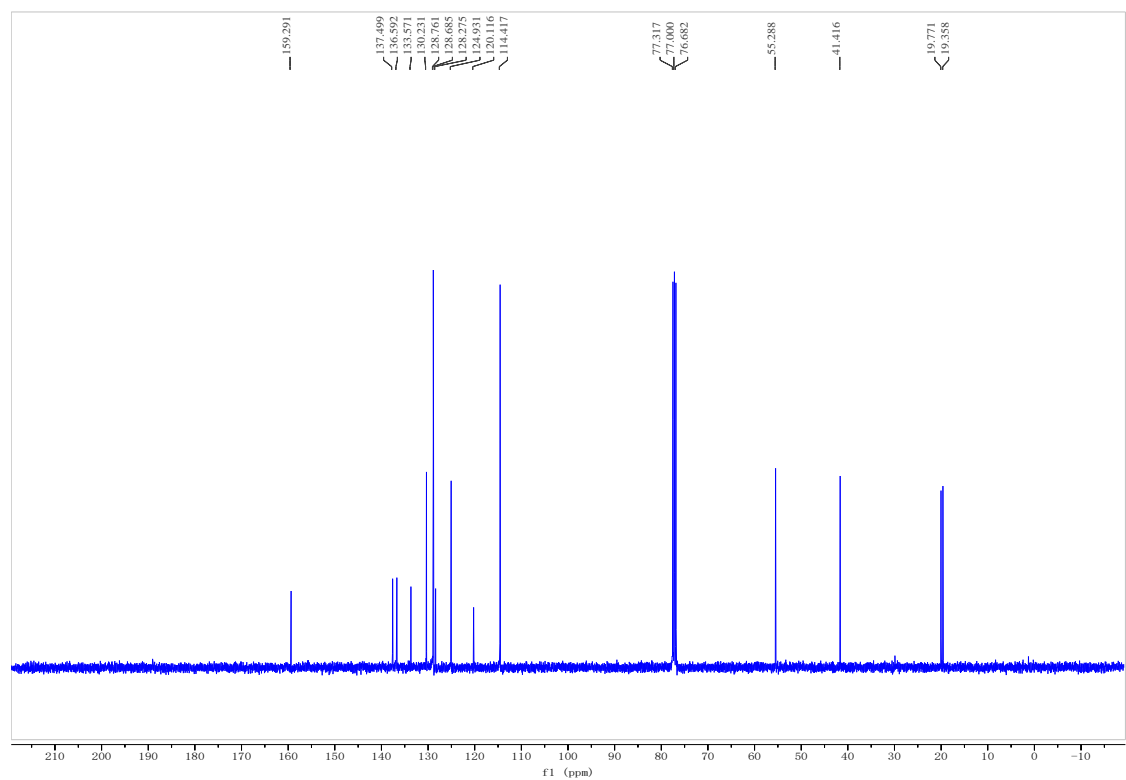

**$^1\text{H}$  and  $^{13}\text{C}$  NMR Spectra for Compound 3g:** $^1\text{H}$  NMR (400 MHz,  $\text{CDCl}_3$ )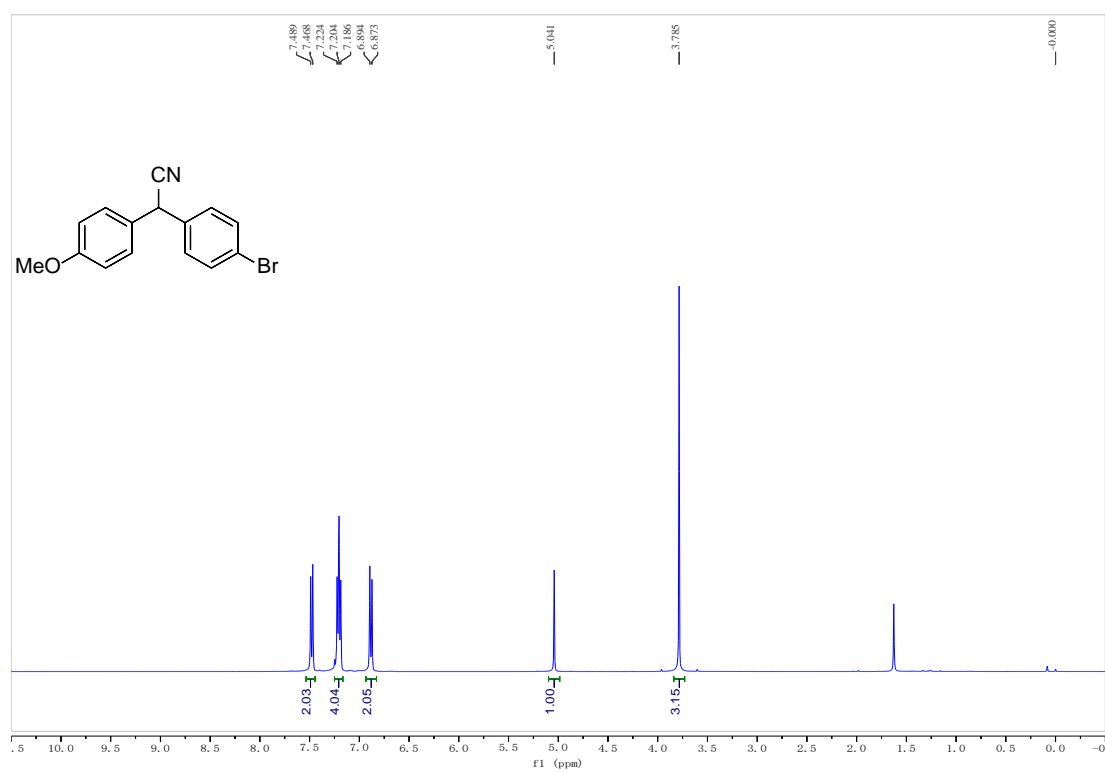 $^{13}\text{C}$  NMR (100 MHz,  $\text{CDCl}_3$ )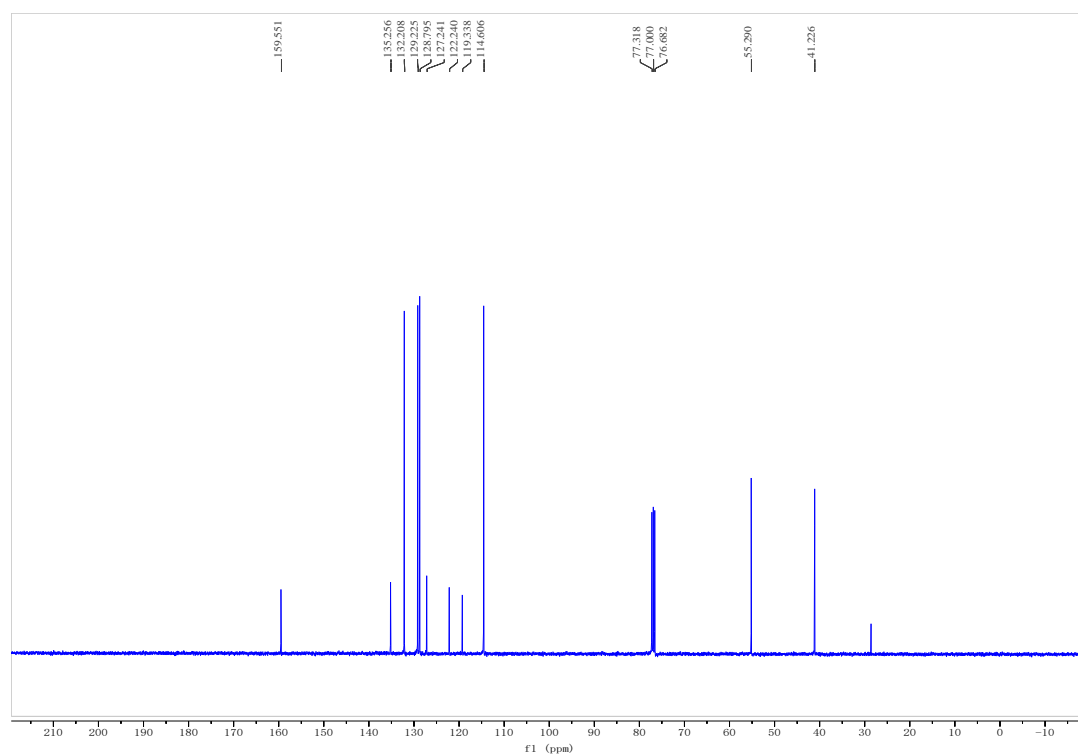



**$^1\text{H}$ ,  $^{13}\text{C}$  and  $^{19}\text{F}$  NMR Spectra for Compound 3h:** $^1\text{H}$  NMR (400 MHz,  $\text{CDCl}_3$ )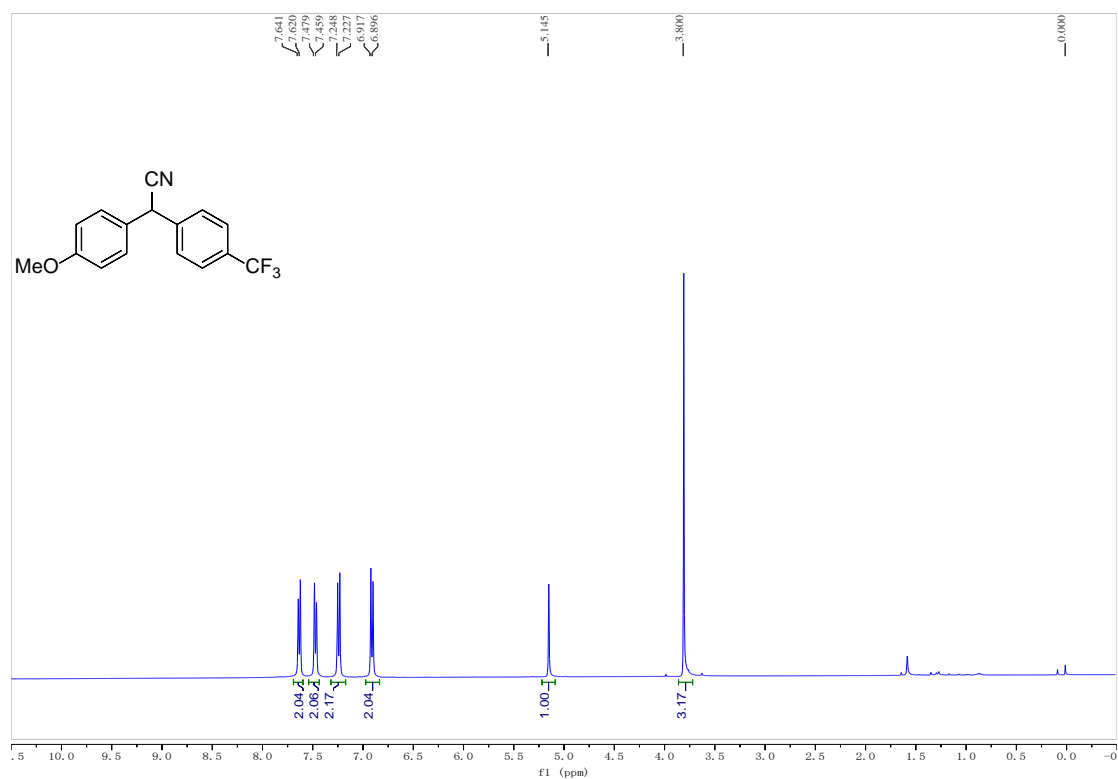 $^{13}\text{C}$  NMR (100 MHz,  $\text{CDCl}_3$ )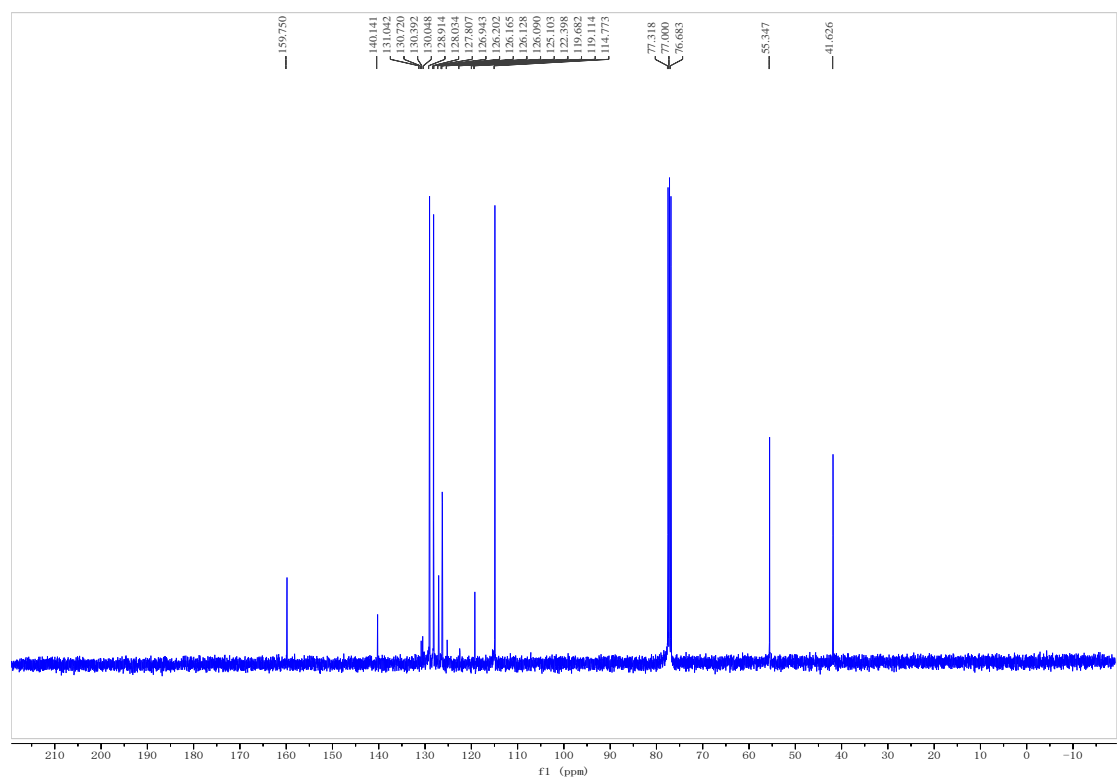

$^{19}\text{F}$  NMR (376 MHz,  $\text{CDCl}_3$ )

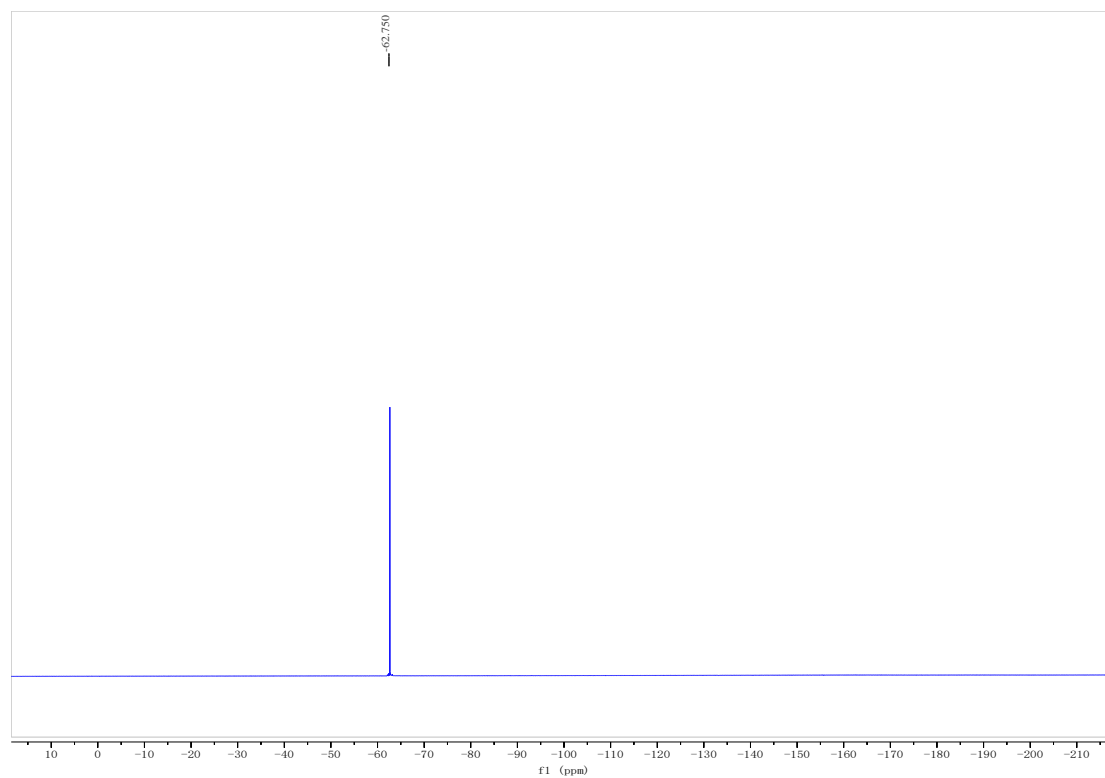

**$^1\text{H}$  and  $^{13}\text{C}$  NMR Spectra for Compound 3i:** $^1\text{H}$  NMR (400 MHz,  $\text{CDCl}_3$ )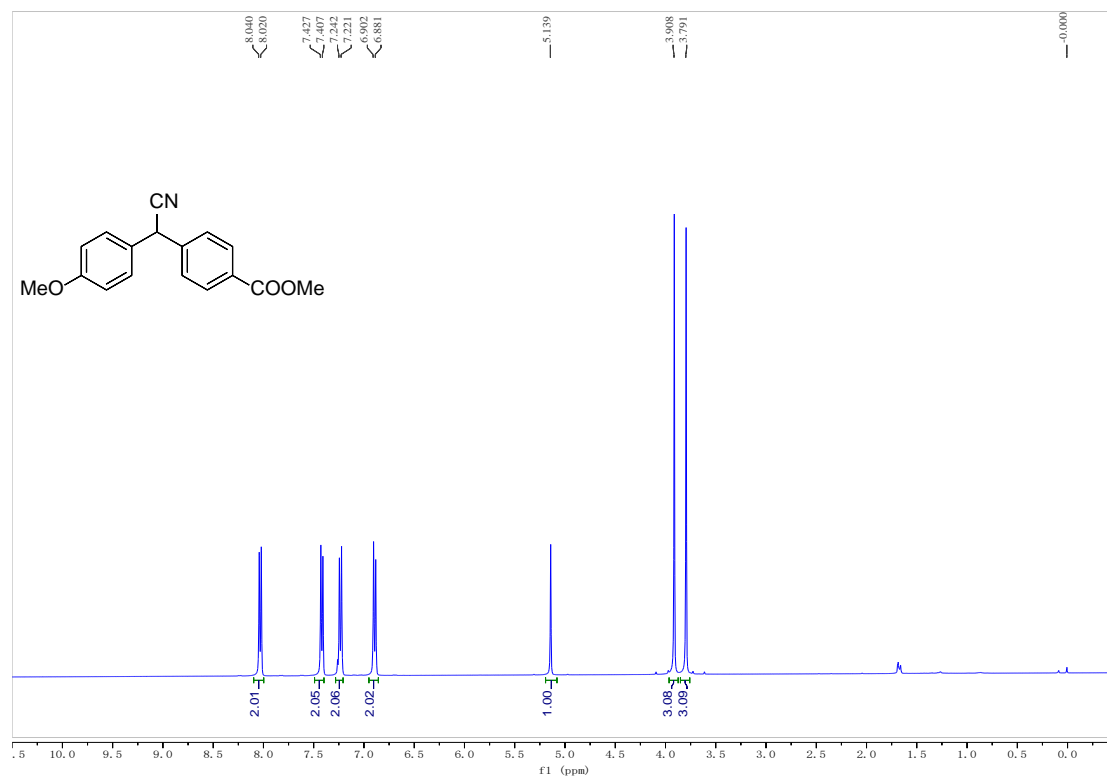 $^{13}\text{C}$  NMR (100 MHz,  $\text{CDCl}_3$ )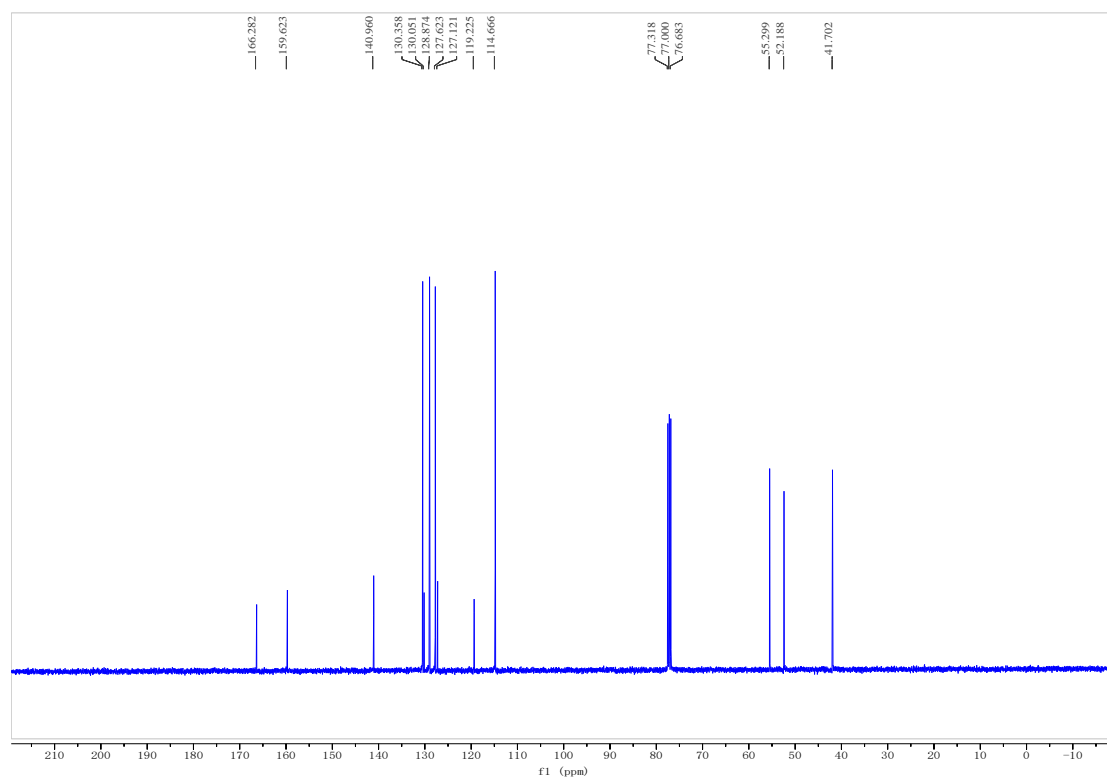

**$^1\text{H}$  and  $^{13}\text{C}$  NMR Spectra for Compound 3j:** $^1\text{H}$  NMR (400 MHz,  $\text{CDCl}_3$ )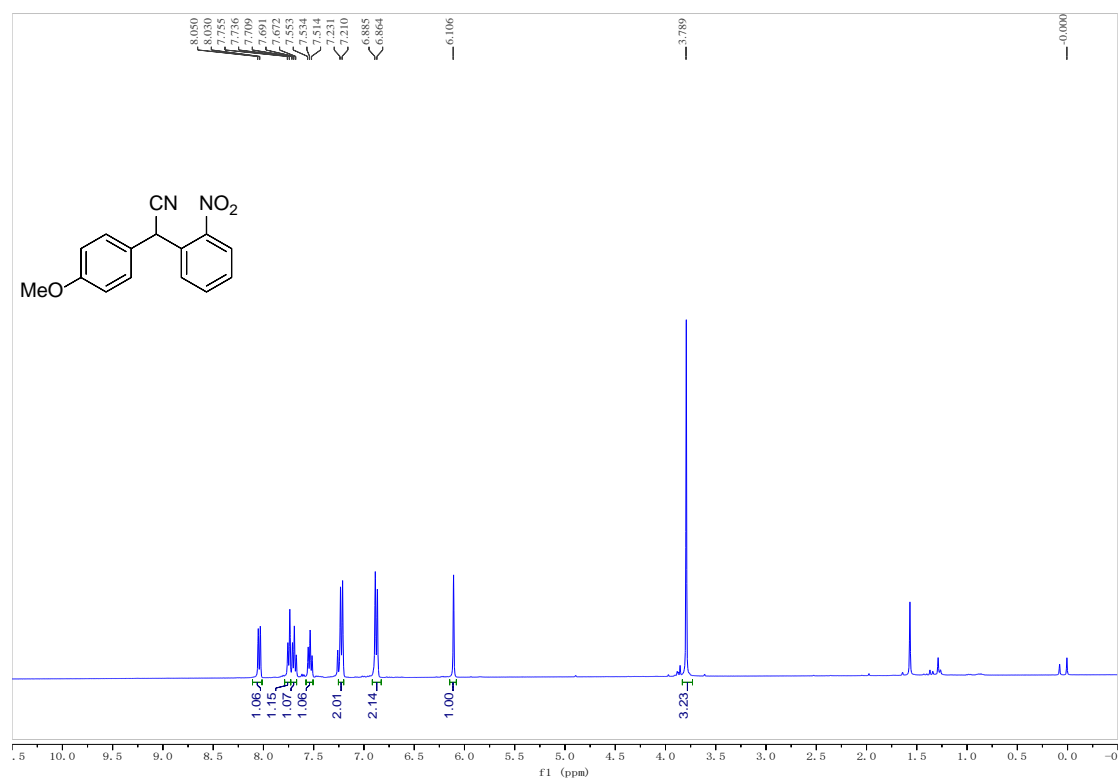 $^{13}\text{C}$  NMR (100 MHz,  $\text{CDCl}_3$ )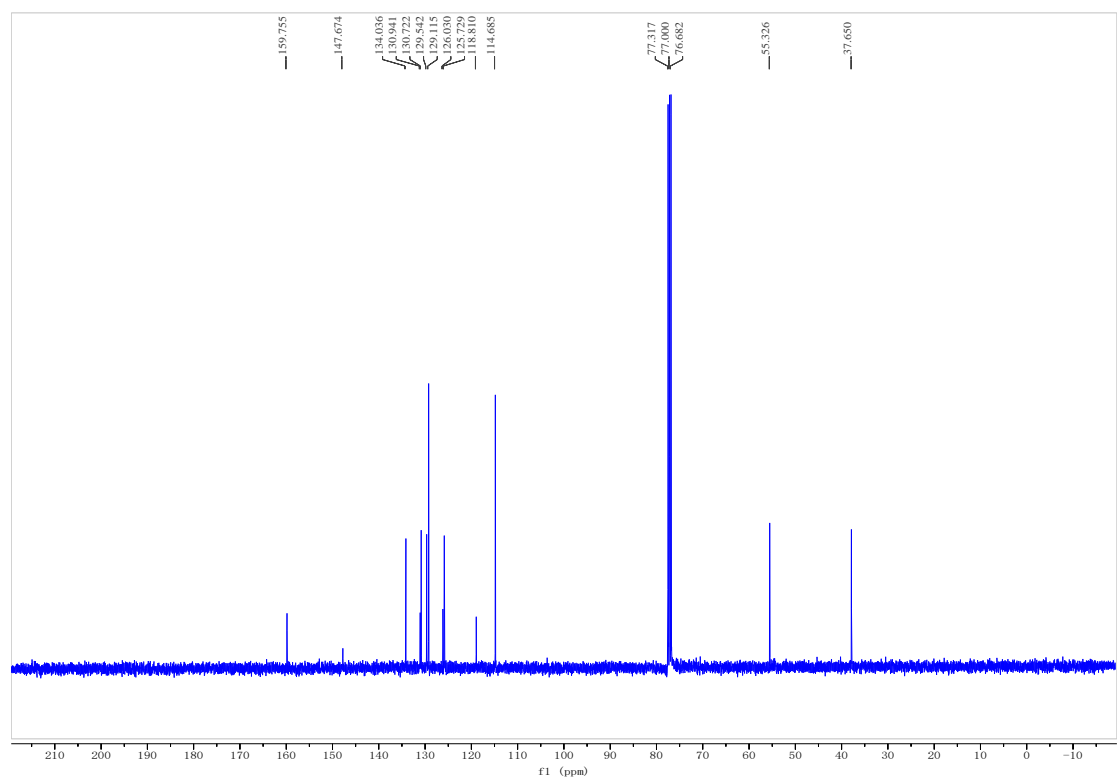

**$^1\text{H}$  and  $^{13}\text{C}$  NMR Spectra for Compound 3k:** $^1\text{H}$  NMR (400 MHz,  $\text{CDCl}_3$ )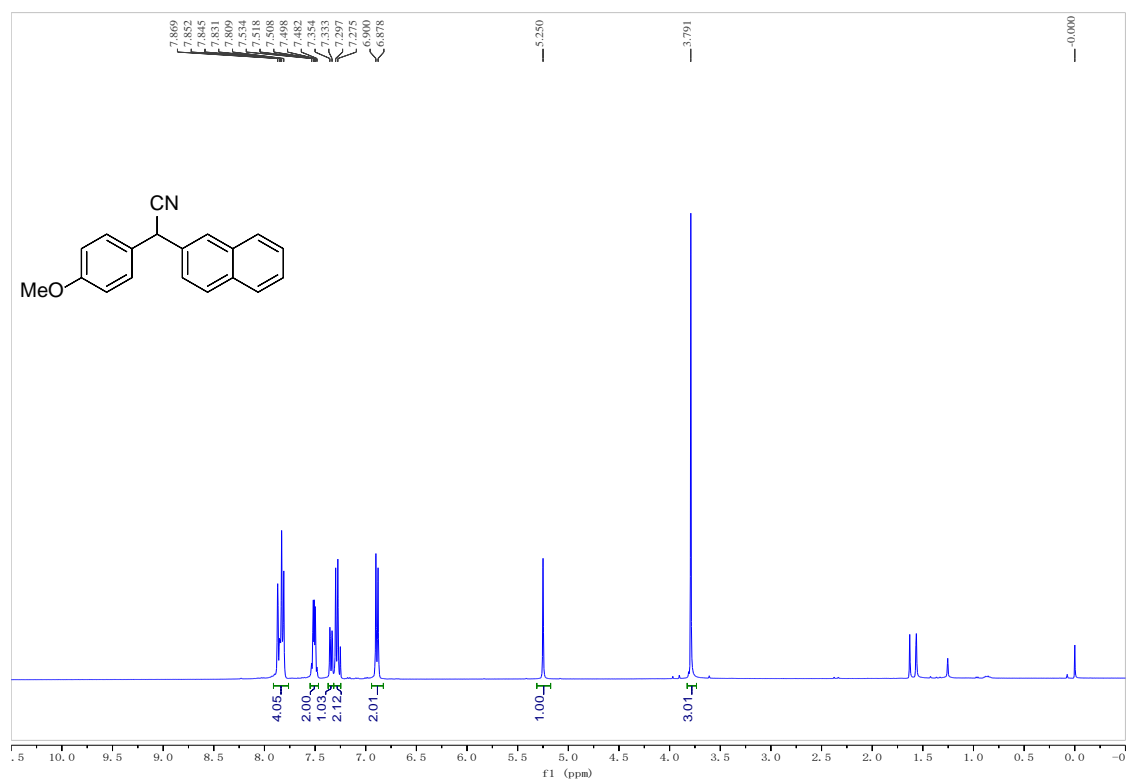 $^{13}\text{C}$  NMR (100 MHz,  $\text{CDCl}_3$ )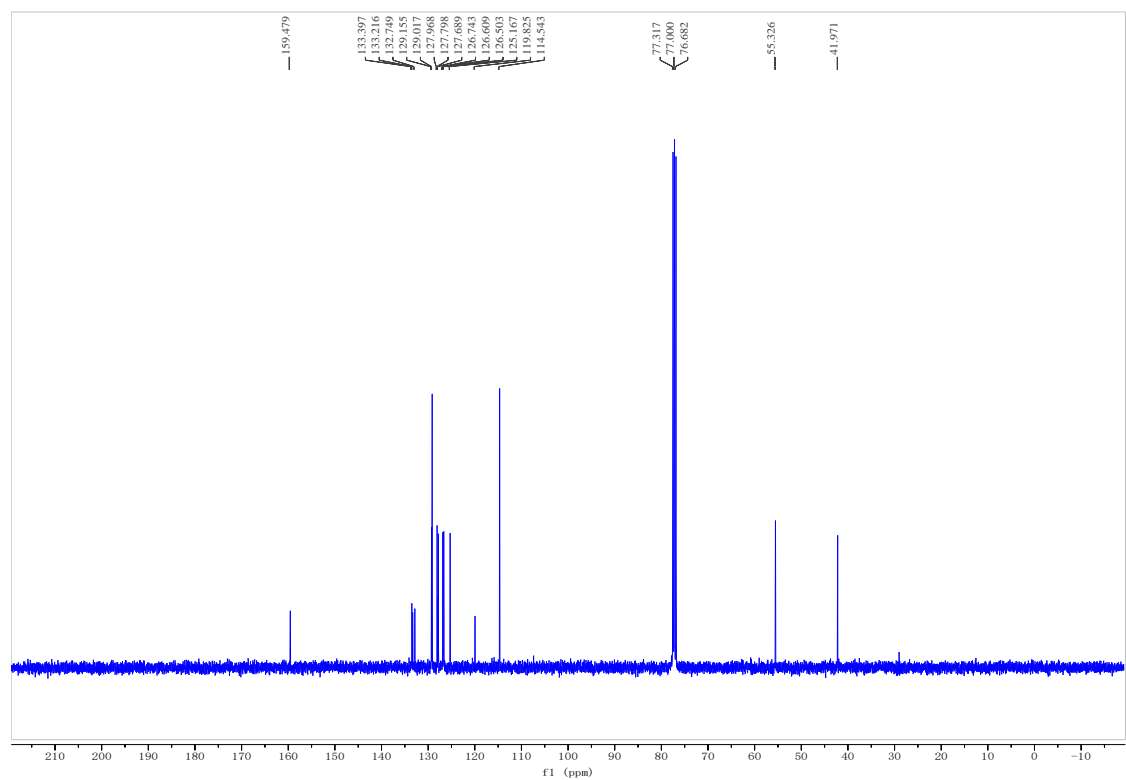

**$^1\text{H}$  and  $^{13}\text{C}$  NMR Spectra for Compound 3l:** $^1\text{H}$  NMR (400 MHz,  $\text{CDCl}_3$ )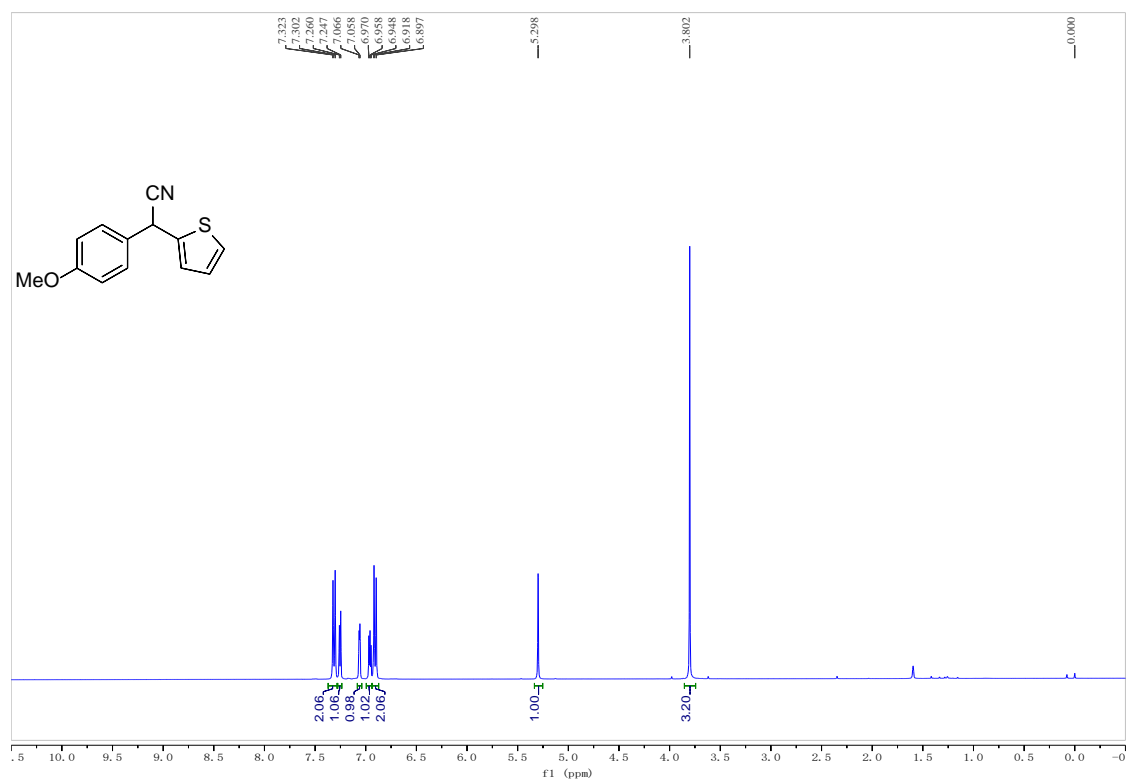 $^{13}\text{C}$  NMR (100 MHz,  $\text{CDCl}_3$ )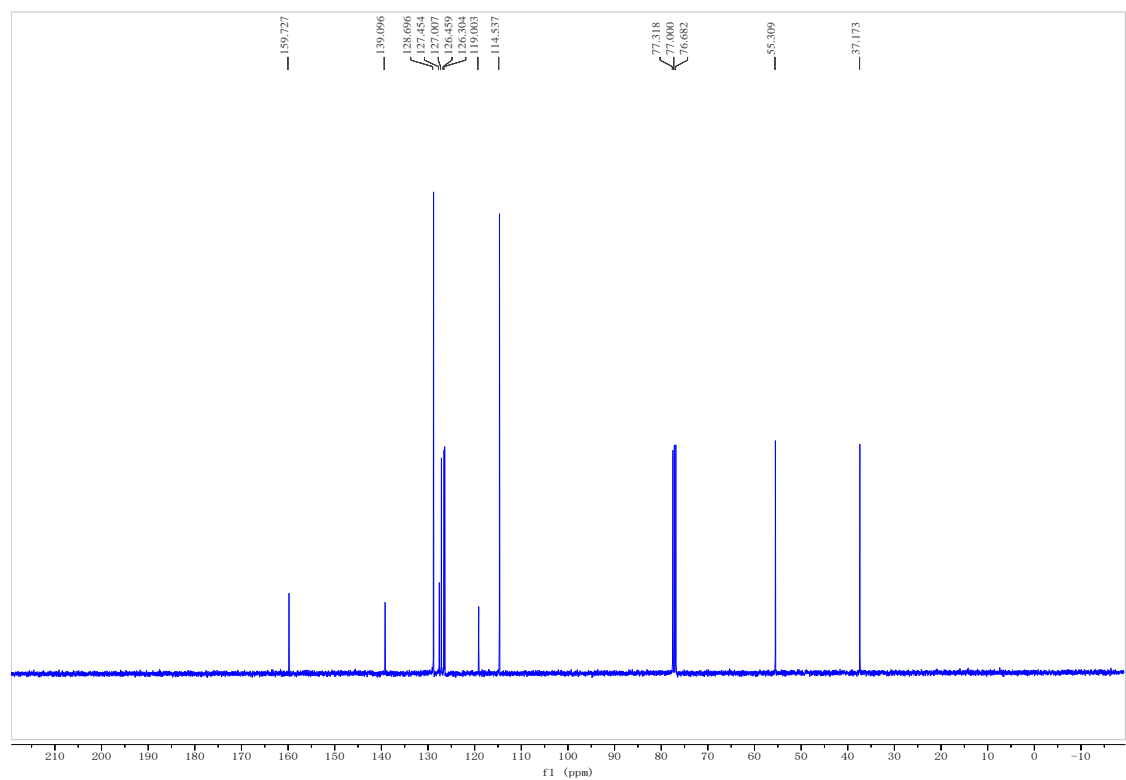

**$^1\text{H}$  and  $^{13}\text{C}$  NMR Spectra for Compound 3m:** $^1\text{H}$  NMR (400 MHz,  $\text{CDCl}_3$ )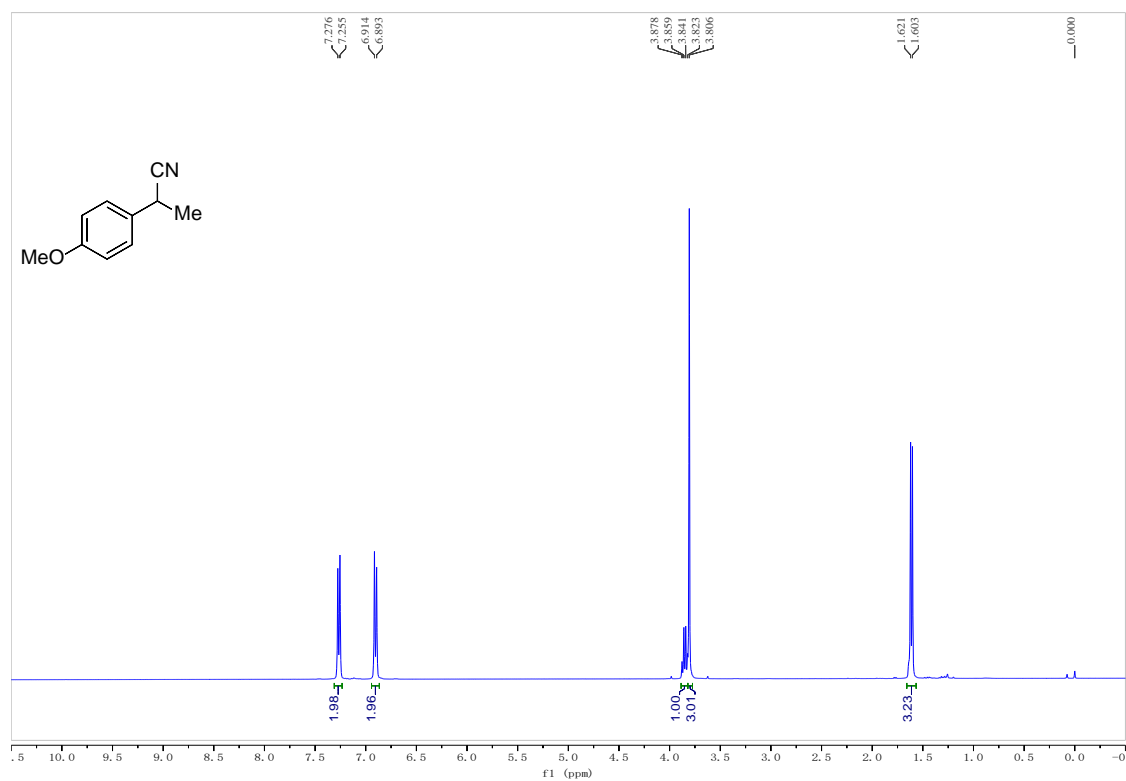 $^{13}\text{C}$  NMR (100 MHz,  $\text{CDCl}_3$ )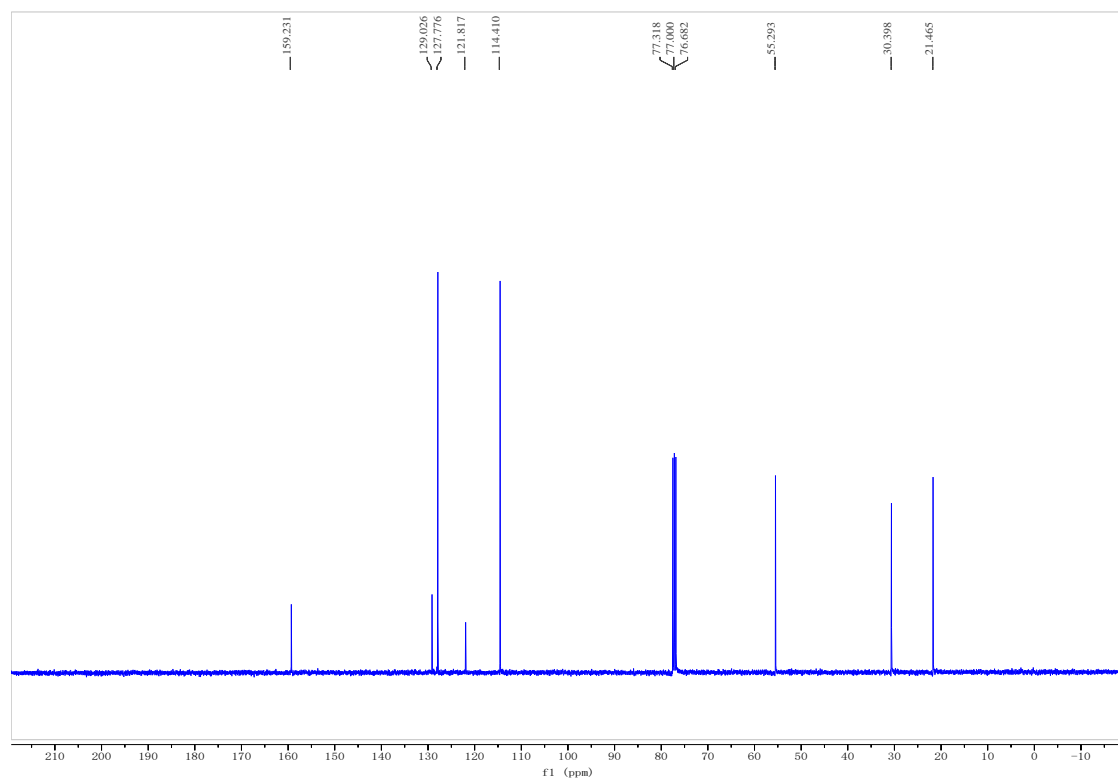

**$^1\text{H}$  and  $^{13}\text{C}$  NMR Spectra for Compound 3n:** $^1\text{H}$  NMR (400 MHz,  $\text{CDCl}_3$ )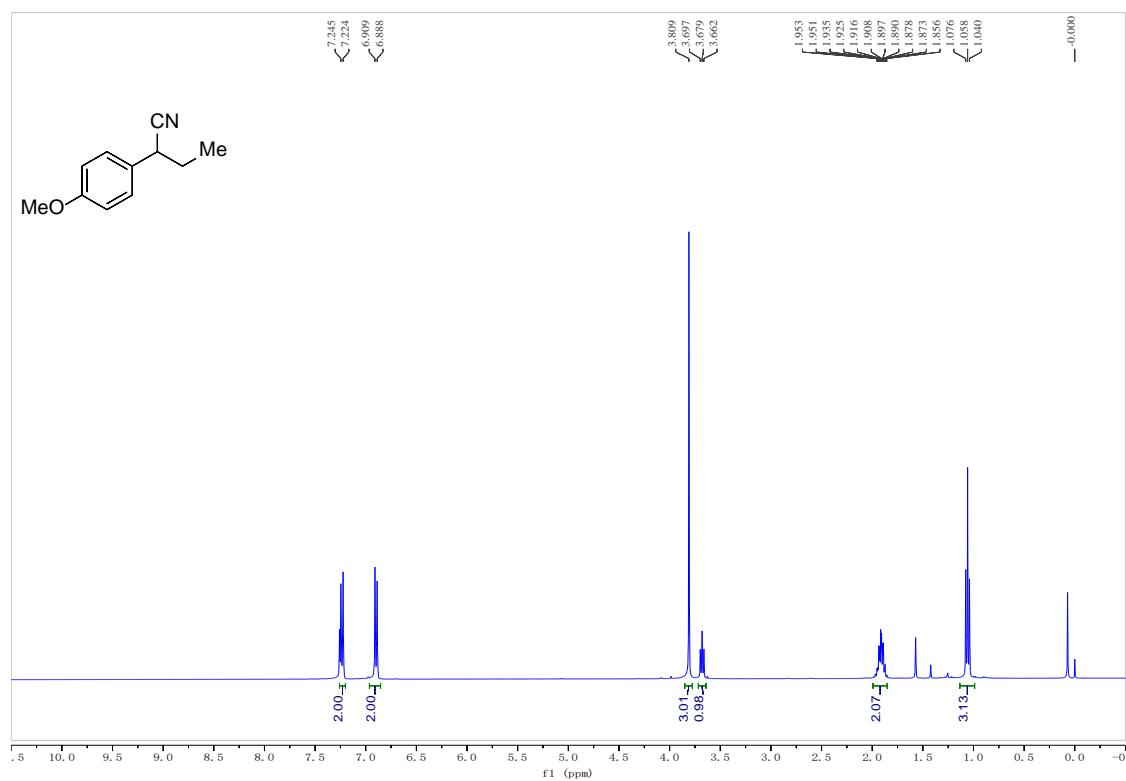 $^{13}\text{C}$  NMR (100 MHz,  $\text{CDCl}_3$ )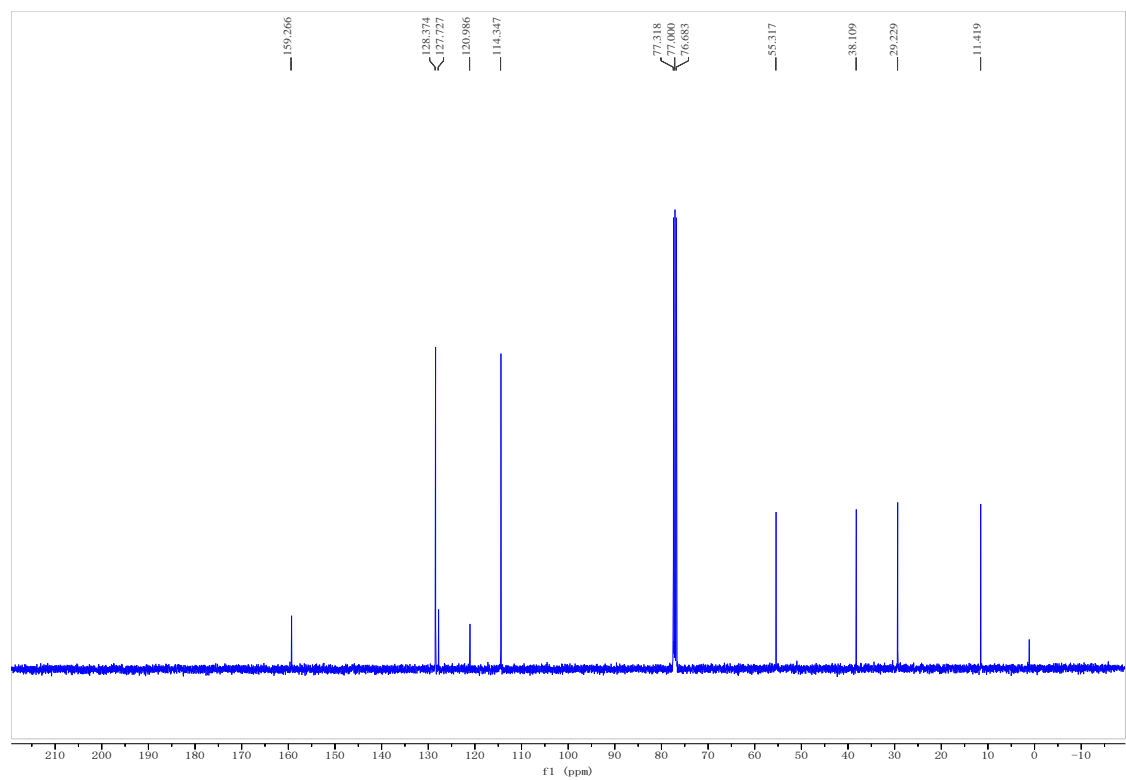



**$^1\text{H}$  and  $^{13}\text{C}$  NMR Spectra for Compound 3o:** $^1\text{H}$  NMR (400 MHz,  $\text{CDCl}_3$ )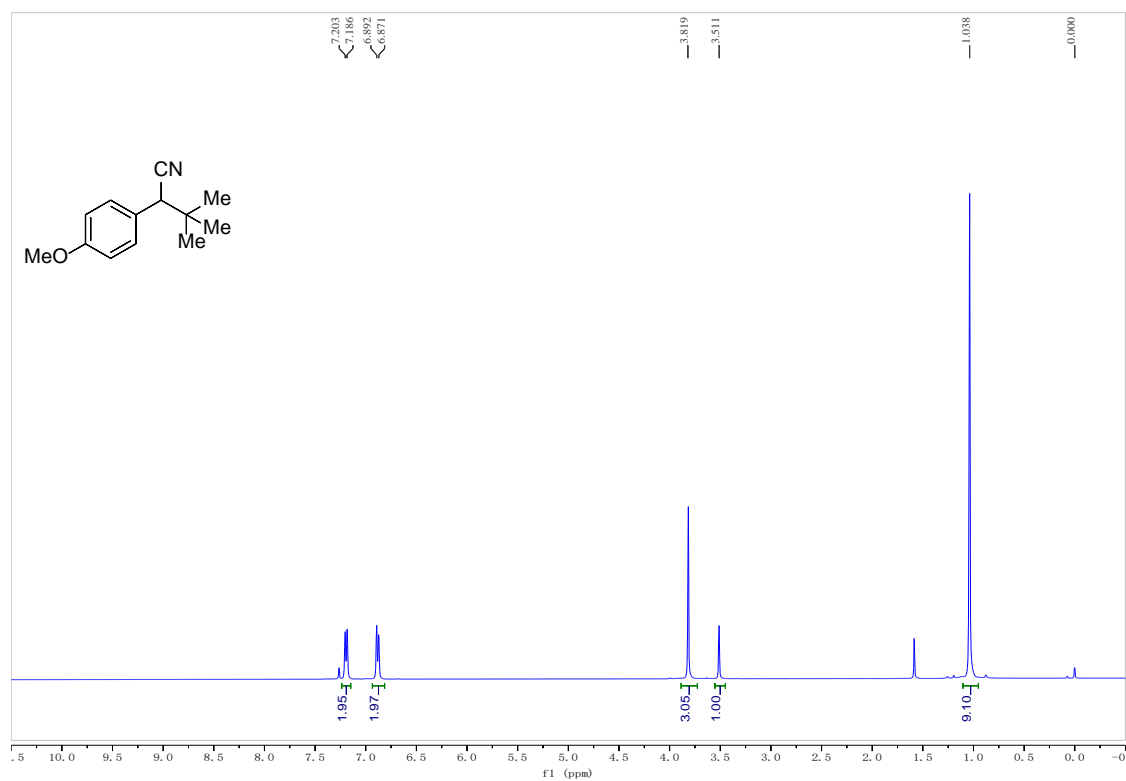 $^{13}\text{C}$  NMR (100 MHz,  $\text{CDCl}_3$ )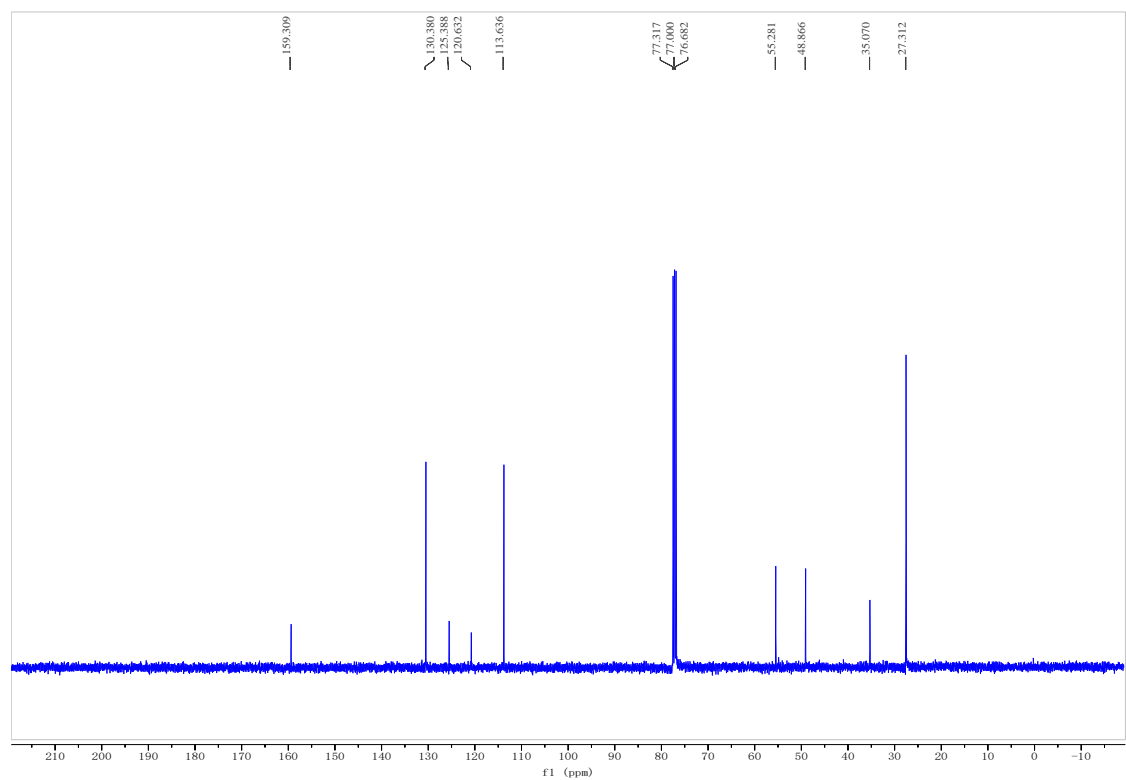

**$^1\text{H}$  and  $^{13}\text{C}$  NMR Spectra for Compound 3p:** $^1\text{H}$  NMR (400 MHz,  $\text{CDCl}_3$ )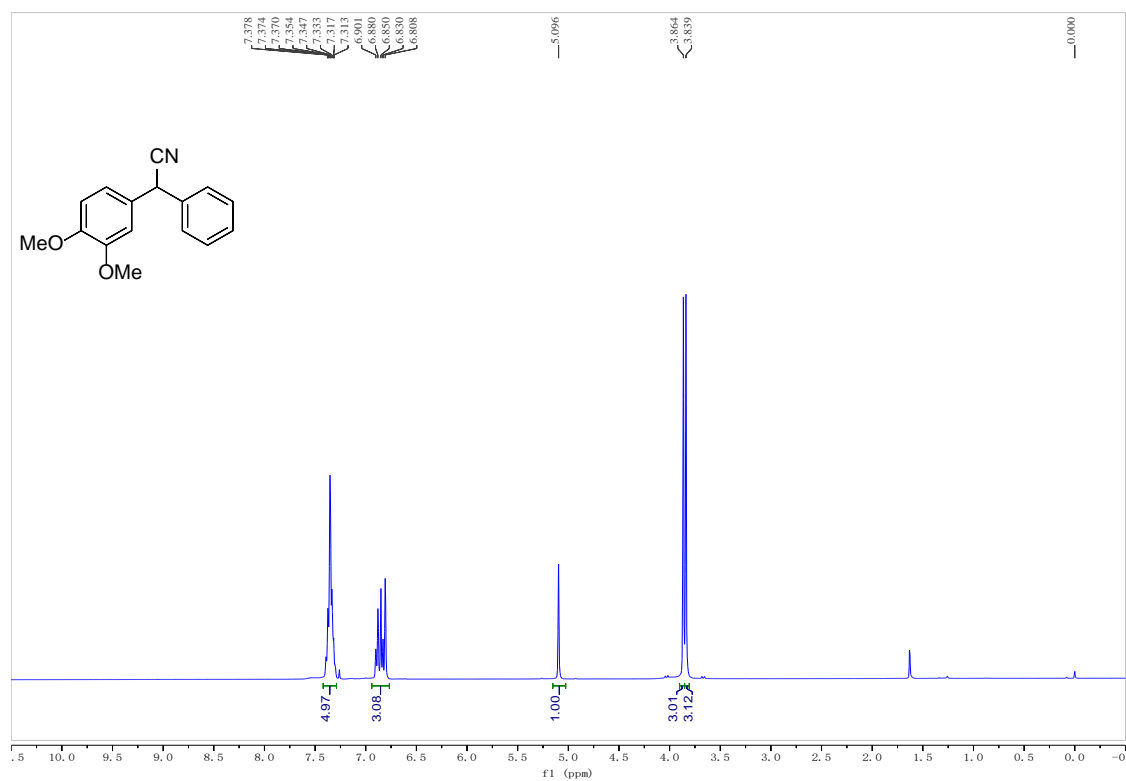 $^{13}\text{C}$  NMR (100 MHz,  $\text{CDCl}_3$ )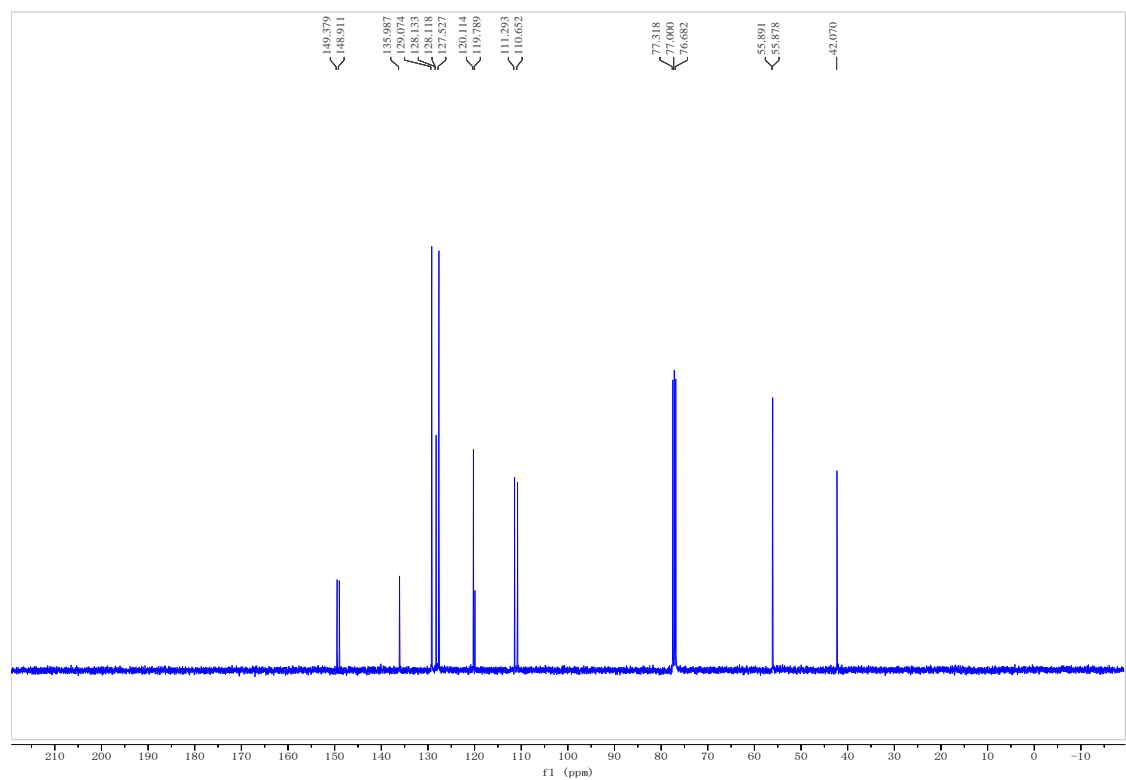

**$^1\text{H}$  and  $^{13}\text{C}$  NMR Spectra for Compound 3q:** $^1\text{H}$  NMR (400 MHz,  $\text{CDCl}_3$ )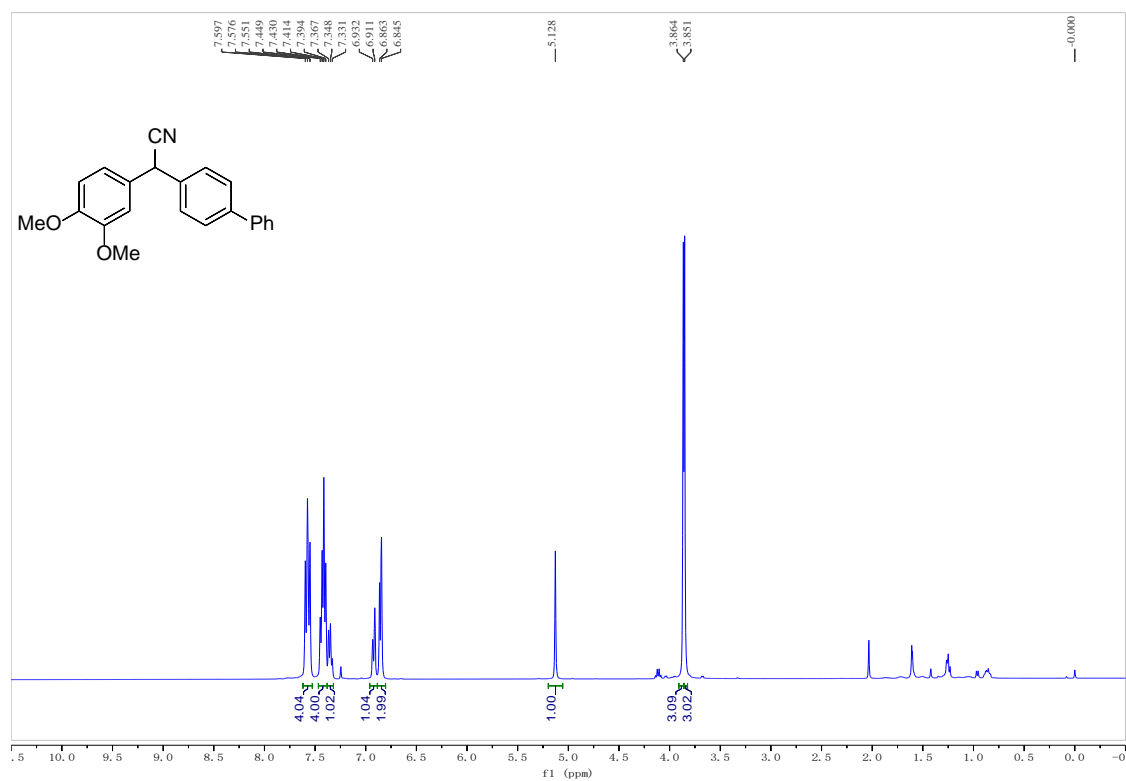 $^{13}\text{C}$  NMR (100 MHz,  $\text{CDCl}_3$ )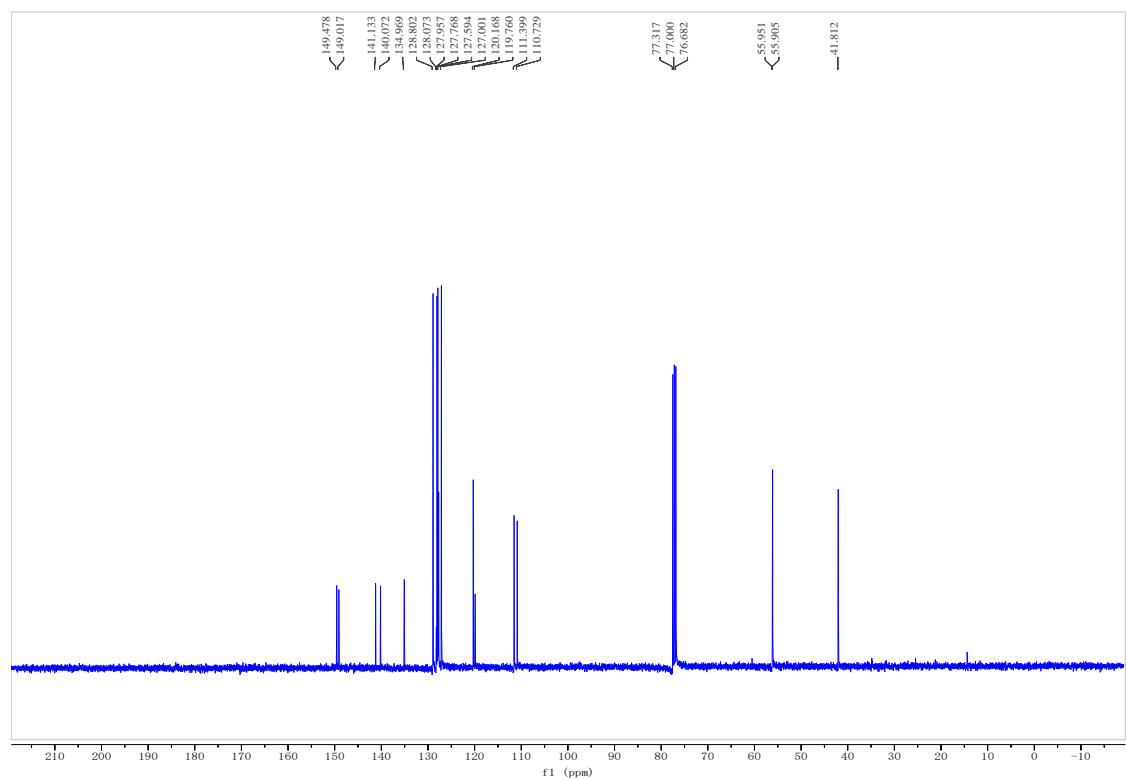

**$^1\text{H}$  and  $^{13}\text{C}$  NMR Spectra for Compound 3r:** $^1\text{H}$  NMR (400 MHz, DMSO- $d_6$ )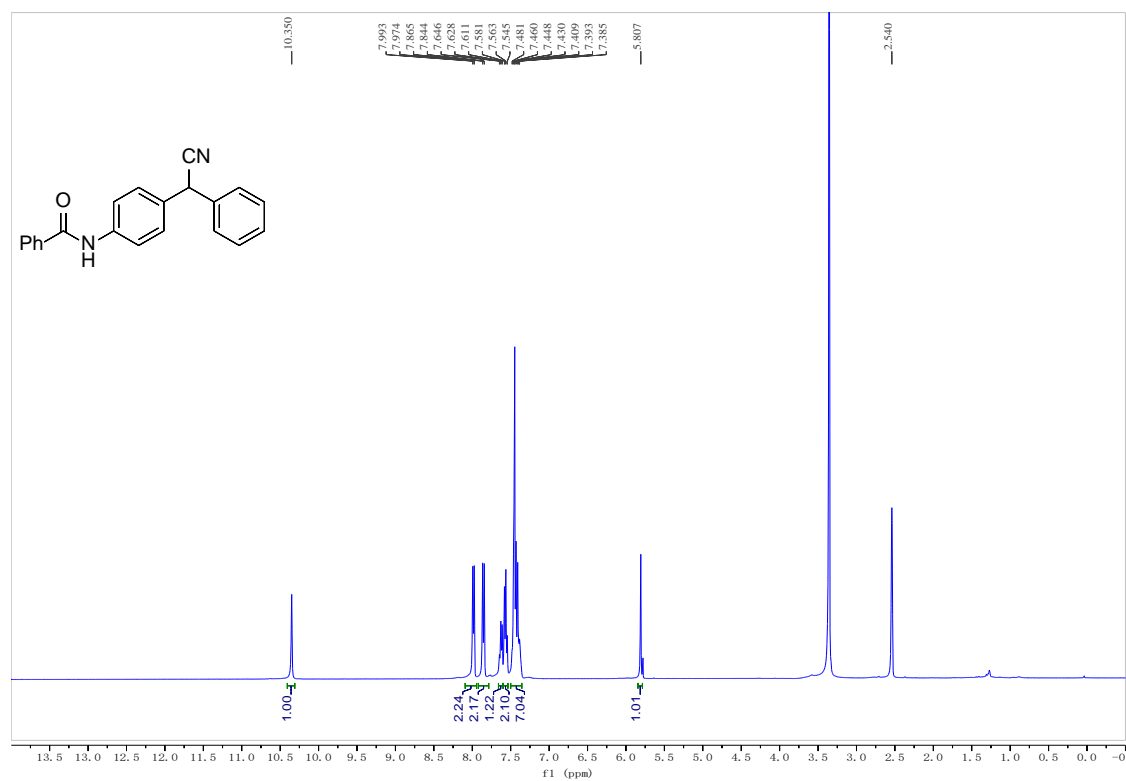 $^{13}\text{C}$  NMR (100 MHz, DMSO- $d_6$ )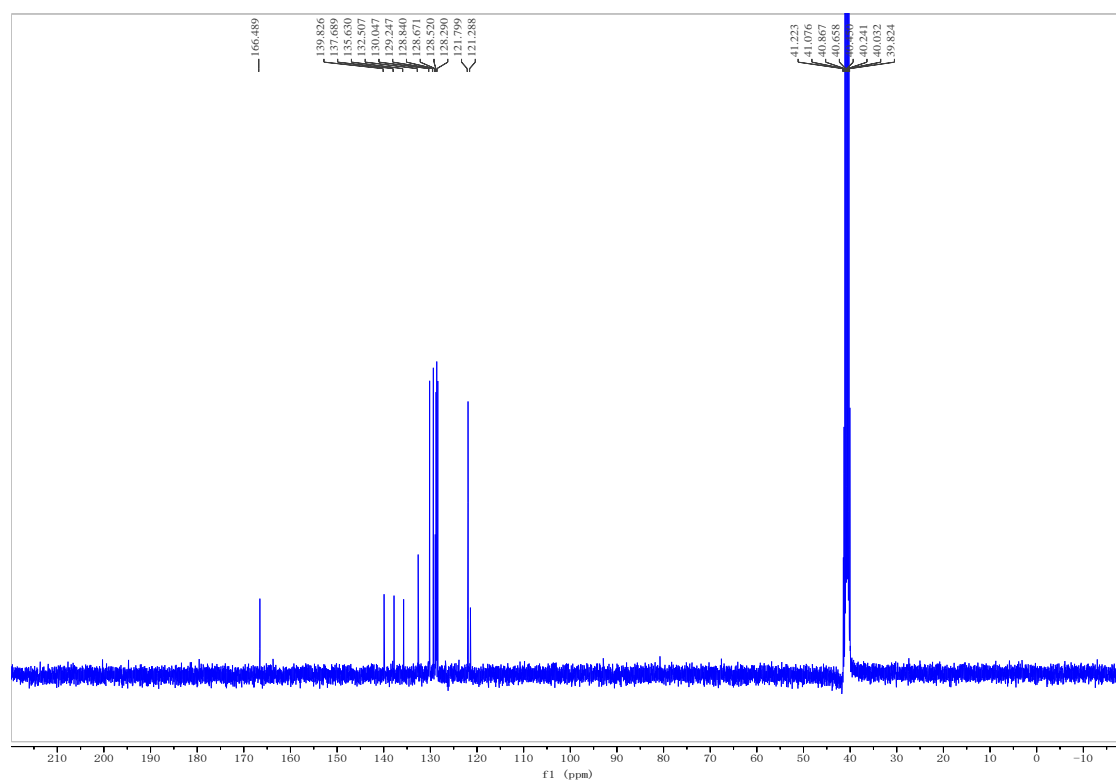

**$^1\text{H}$  and  $^{13}\text{C}$  NMR Spectra for Compound 3s:** $^1\text{H}$  NMR (400 MHz,  $\text{CDCl}_3$ )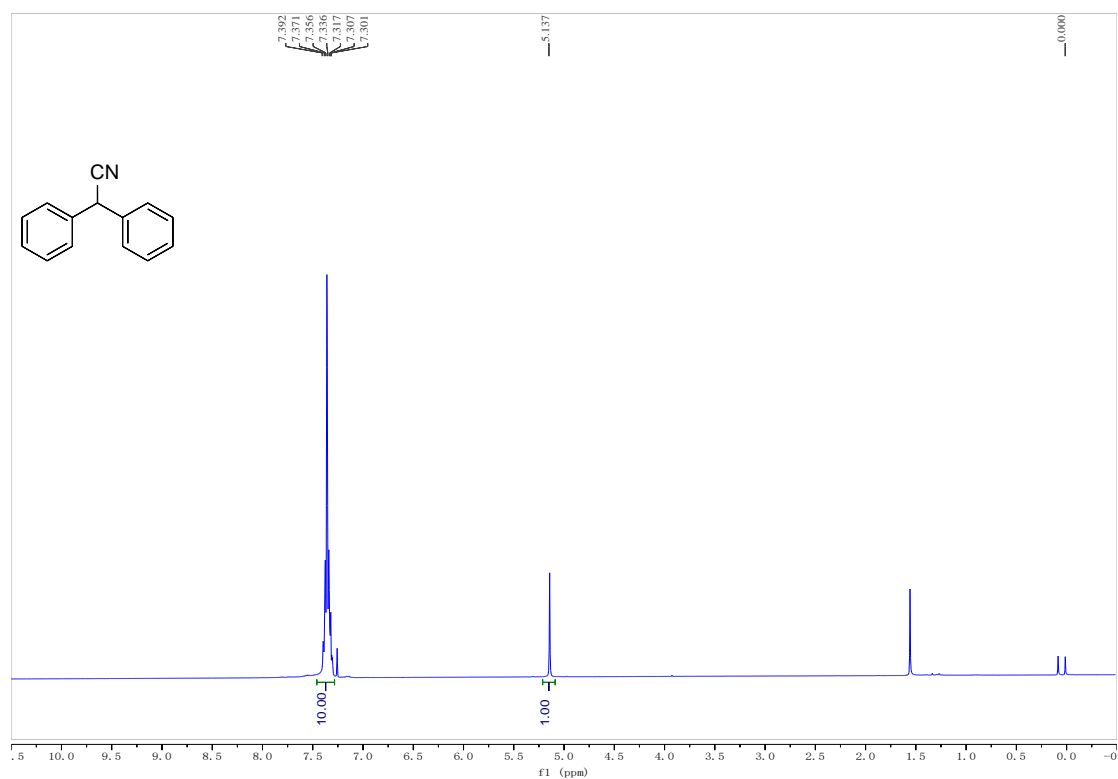 $^{13}\text{C}$  NMR (100 MHz,  $\text{CDCl}_3$ )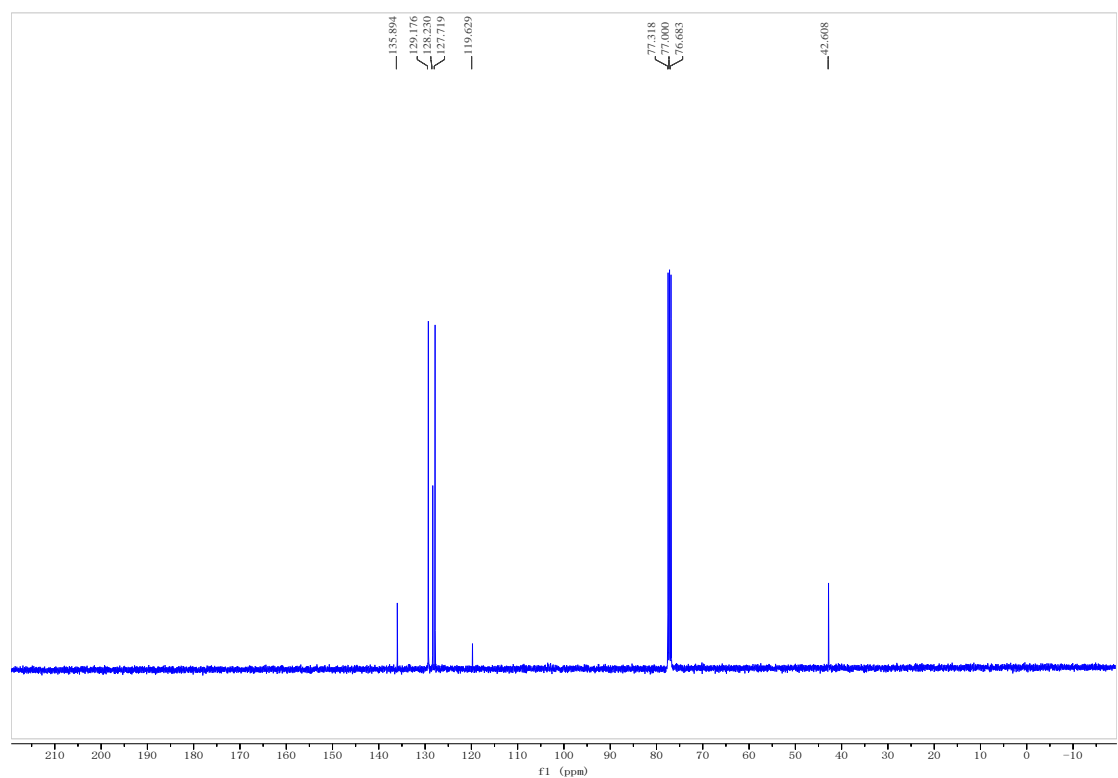

**$^1\text{H}$  and  $^{13}\text{C}$  NMR Spectra for Compound 3t:** $^1\text{H}$  NMR (400 MHz,  $\text{CDCl}_3$ )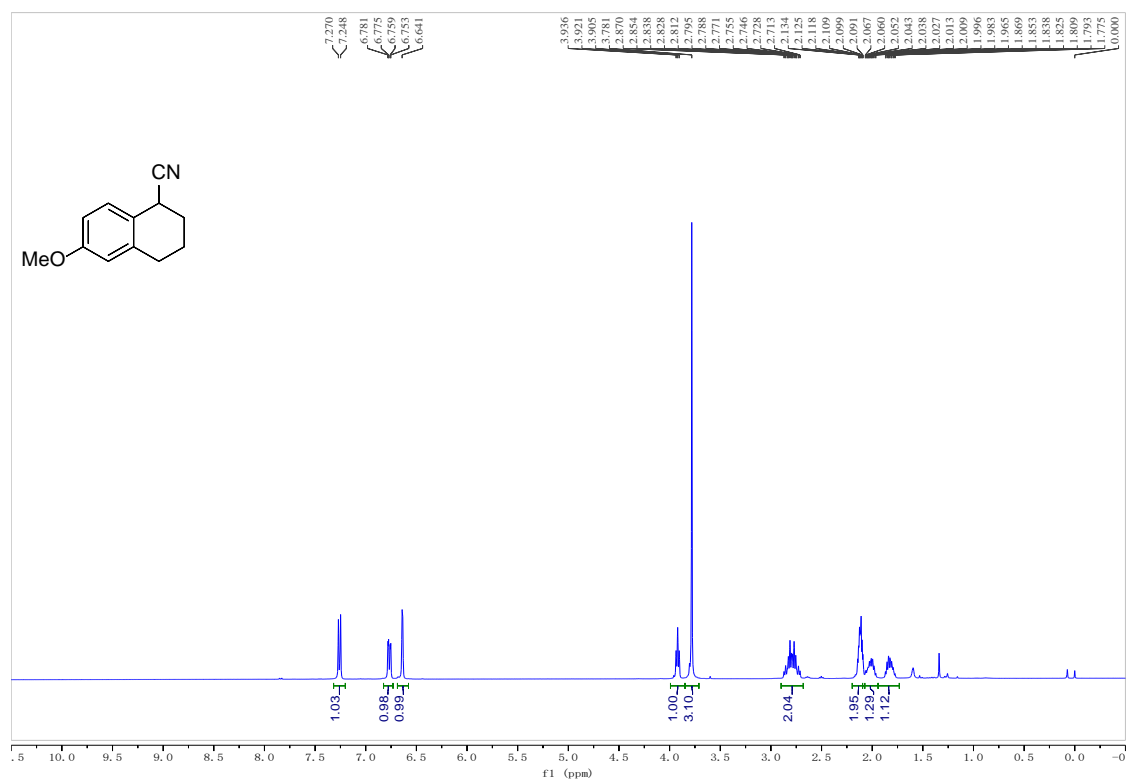 $^{13}\text{C}$  NMR (100 MHz,  $\text{CDCl}_3$ )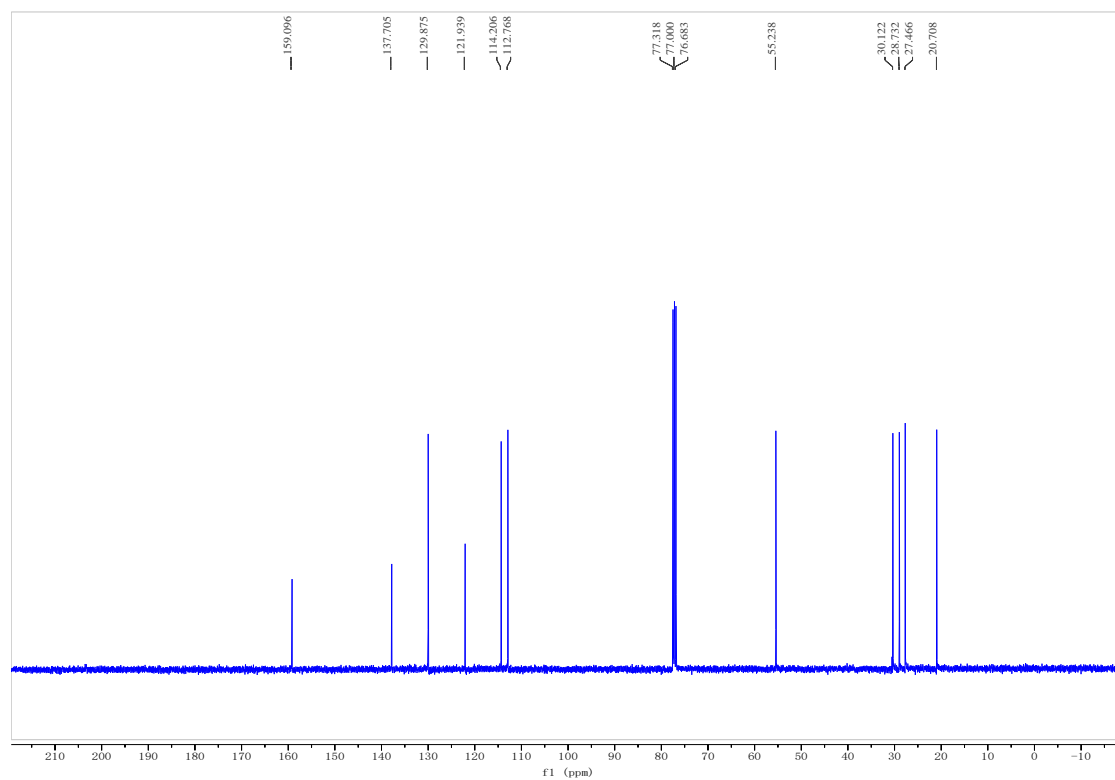

**$^1\text{H}$  and  $^{13}\text{C}$  NMR Spectra for Compound 3u:** $^1\text{H}$  NMR (400 MHz,  $\text{CDCl}_3$ )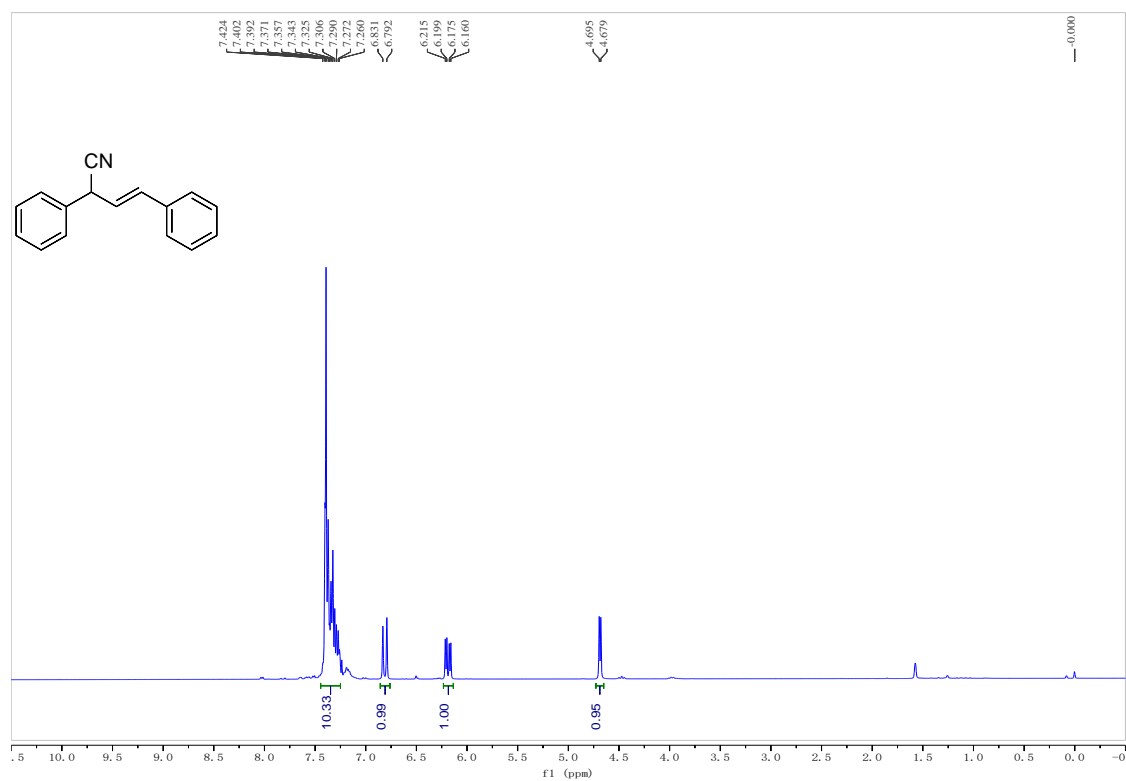 $^{13}\text{C}$  NMR (100 MHz,  $\text{CDCl}_3$ )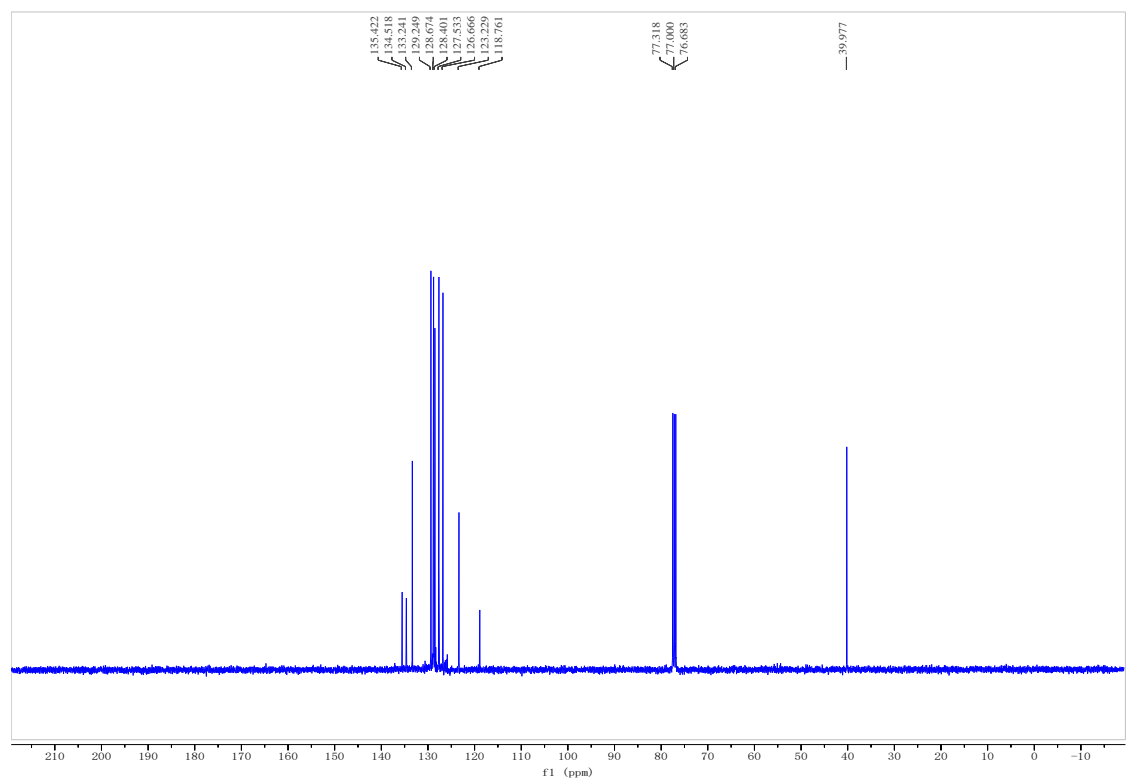

**$^1\text{H}$  and  $^{13}\text{C}$  NMR Spectra for Compound 3v:** $^1\text{H}$  NMR (400 MHz,  $\text{CDCl}_3$ )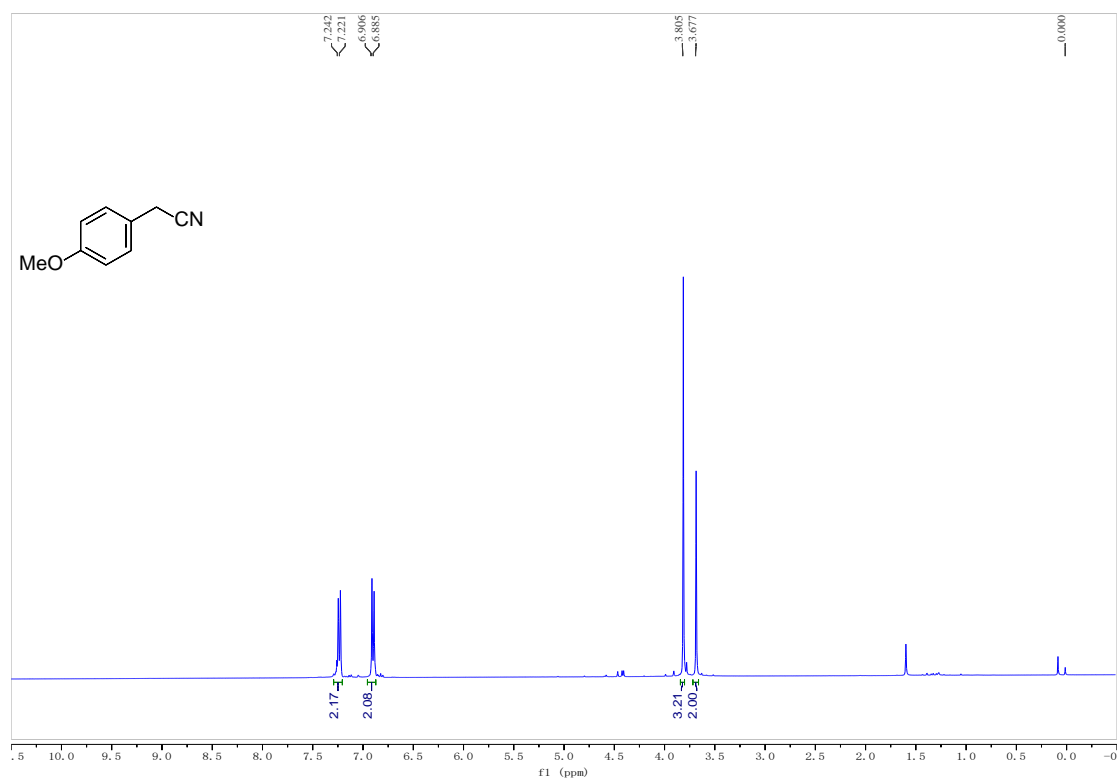 $^{13}\text{C}$  NMR (100 MHz,  $\text{CDCl}_3$ )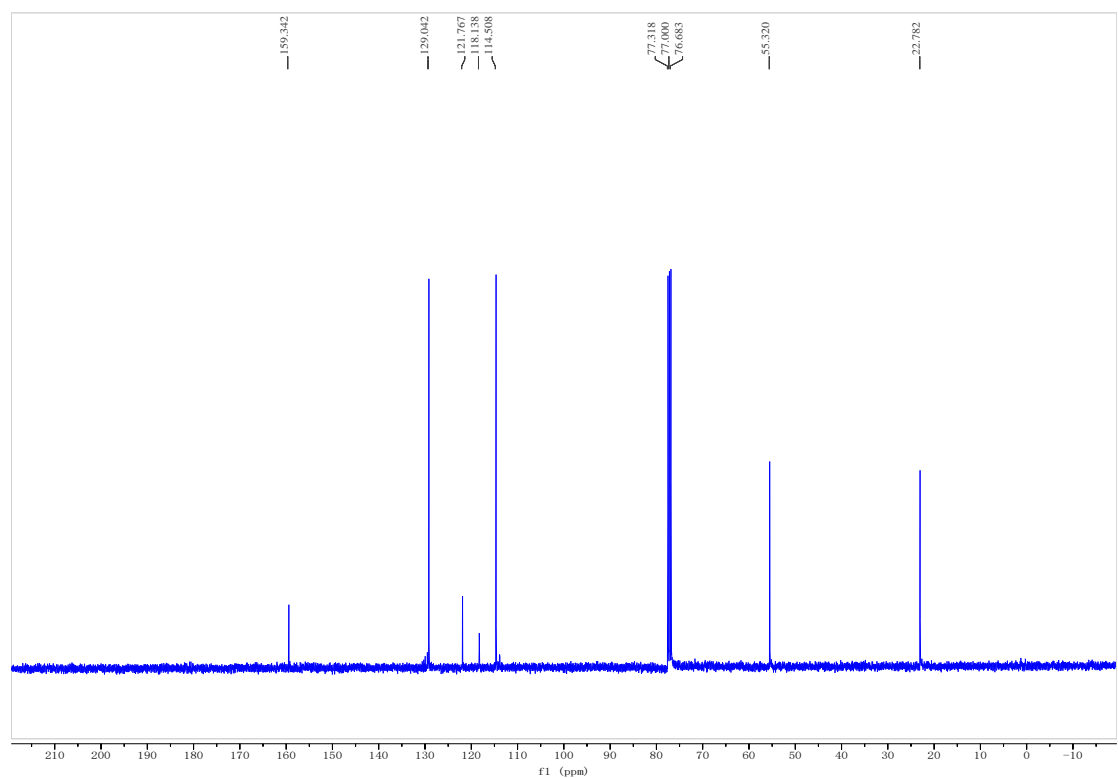



**$^1\text{H}$  and  $^{13}\text{C}$  NMR Spectra for Compound 3w:** $^1\text{H}$  NMR (400 MHz,  $\text{CDCl}_3$ )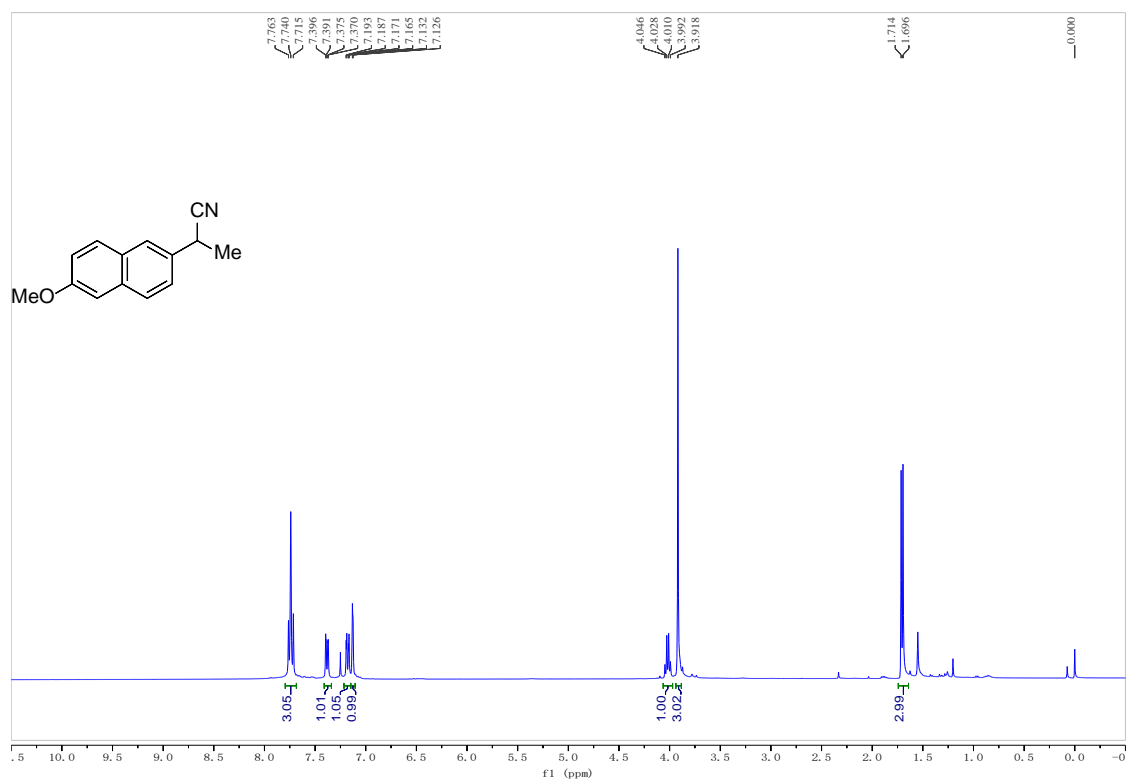 $^{13}\text{C}$  NMR (100 MHz,  $\text{CDCl}_3$ )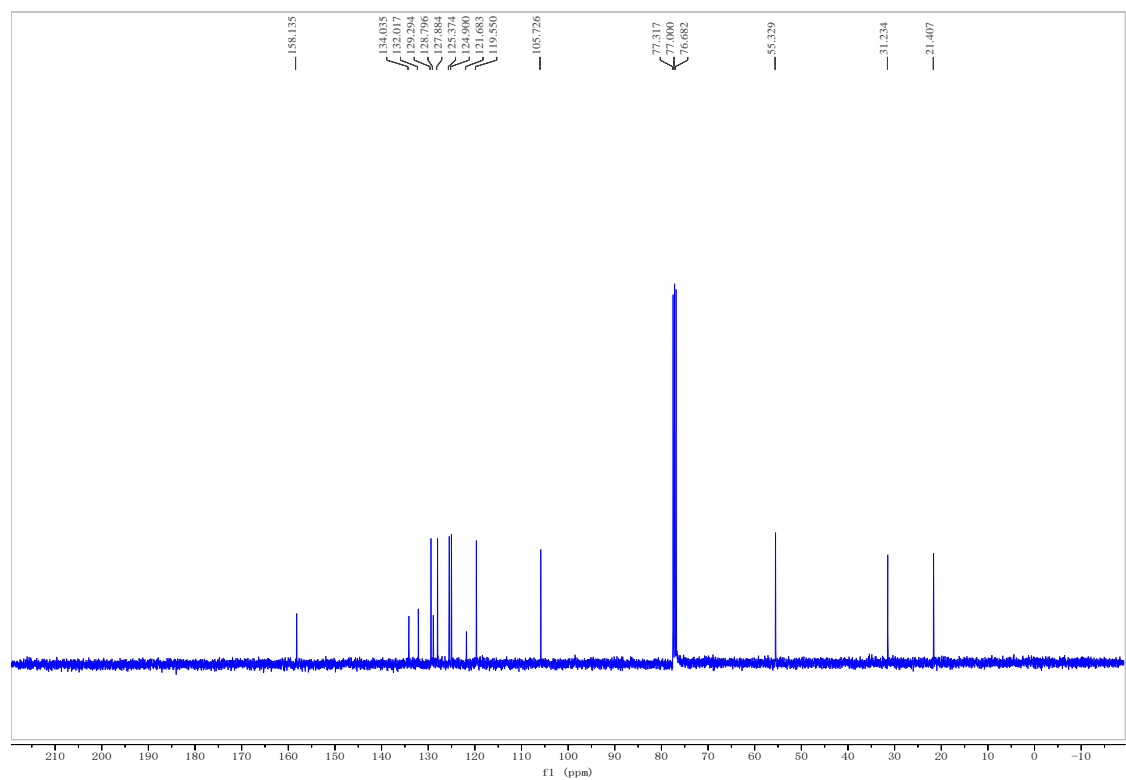

**$^1\text{H}$  and  $^{13}\text{C}$  NMR Spectra for Compound 3x:** $^1\text{H}$  NMR (400 MHz,  $\text{CDCl}_3$ )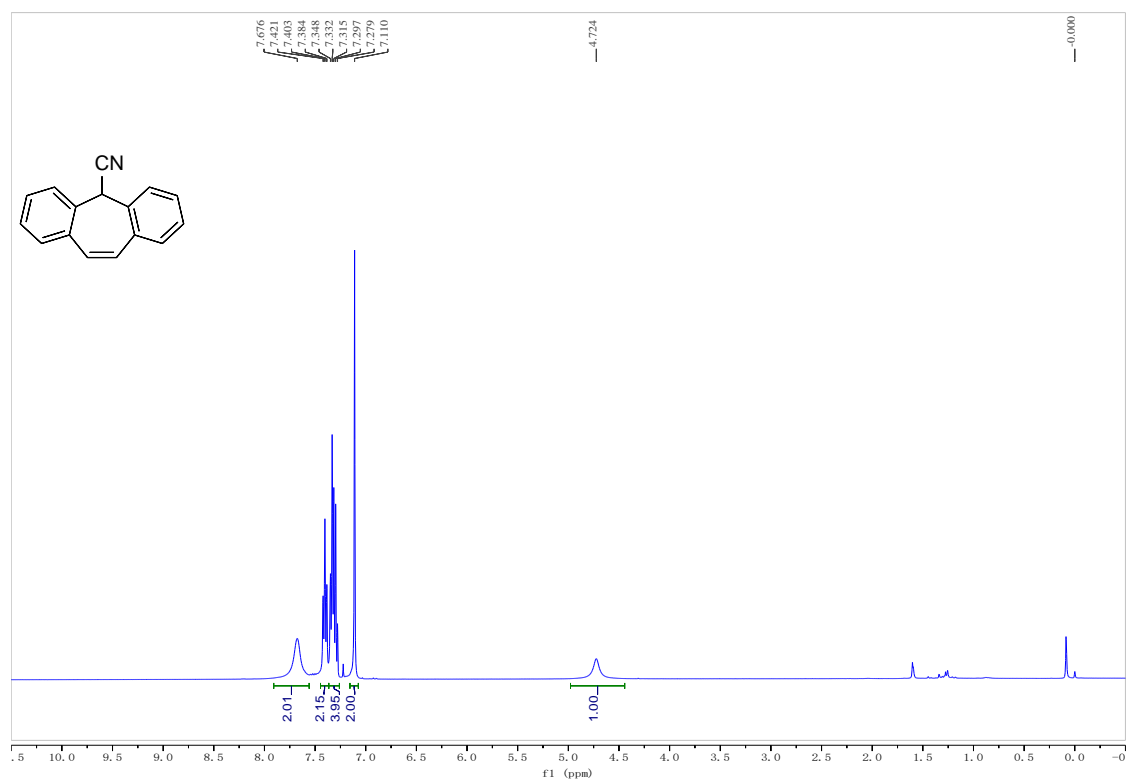 $^{13}\text{C}$  NMR (100 MHz,  $\text{CDCl}_3$ )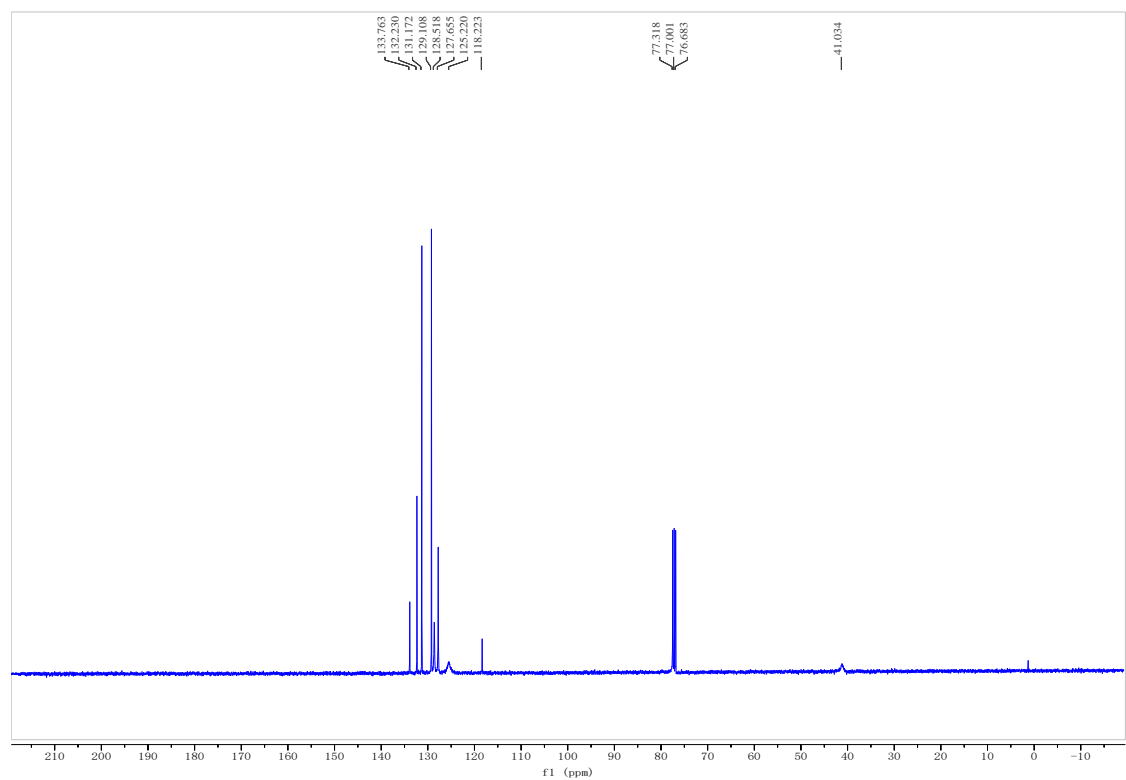

**$^1\text{H}$  and  $^{13}\text{C}$  NMR Spectra for Compound 3y:** $^1\text{H}$  NMR (400 MHz,  $\text{CDCl}_3$ )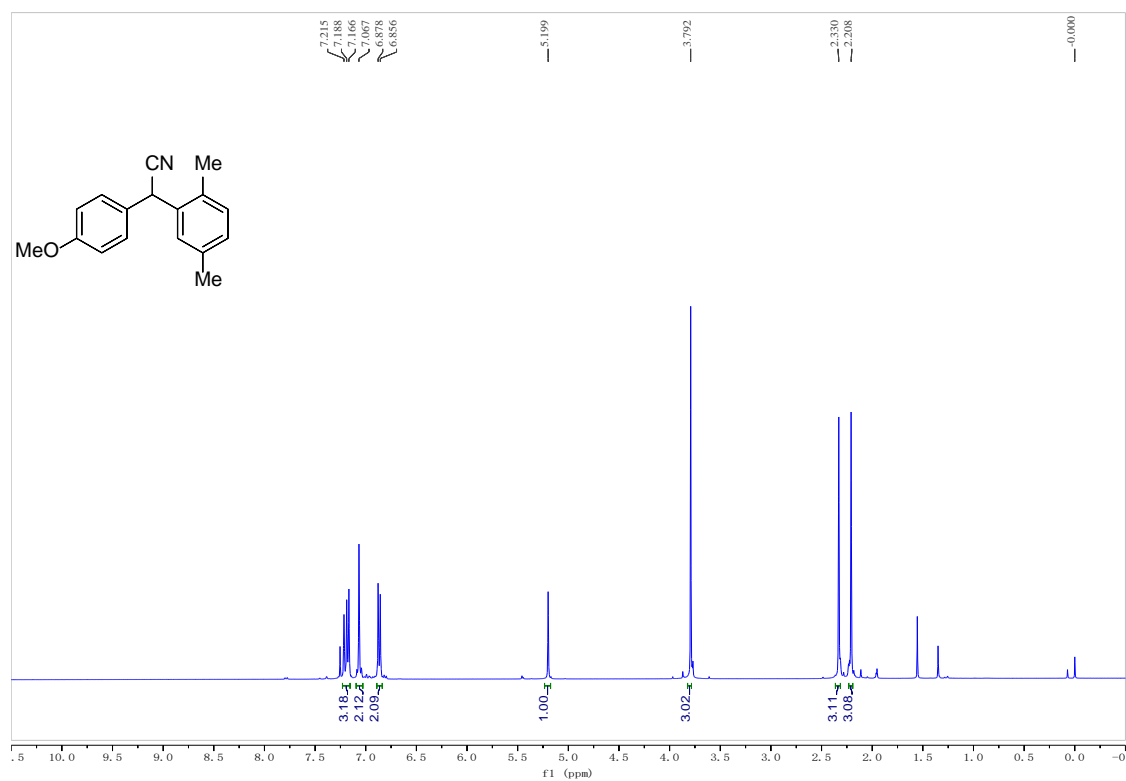 $^{13}\text{C}$  NMR (100 MHz,  $\text{CDCl}_3$ )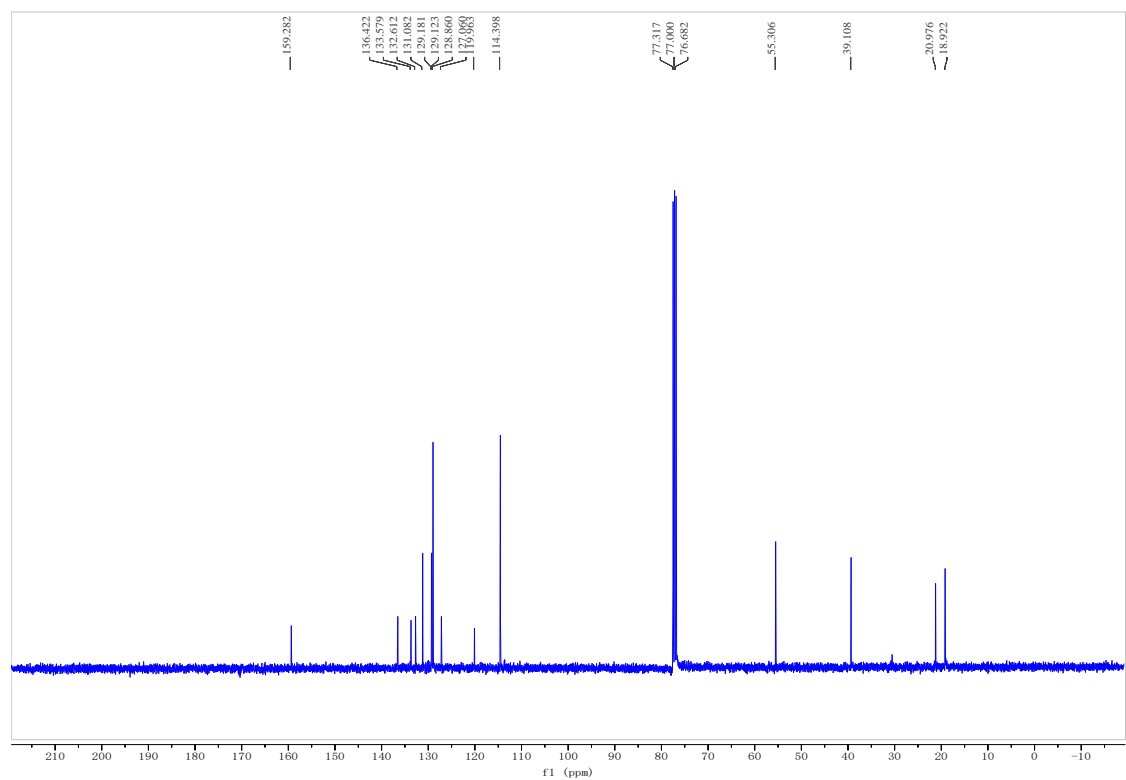

**$^1\text{H}$  and  $^{13}\text{C}$  NMR Spectra for Compound 4y:** $^1\text{H}$  NMR (400 MHz,  $\text{CDCl}_3$ )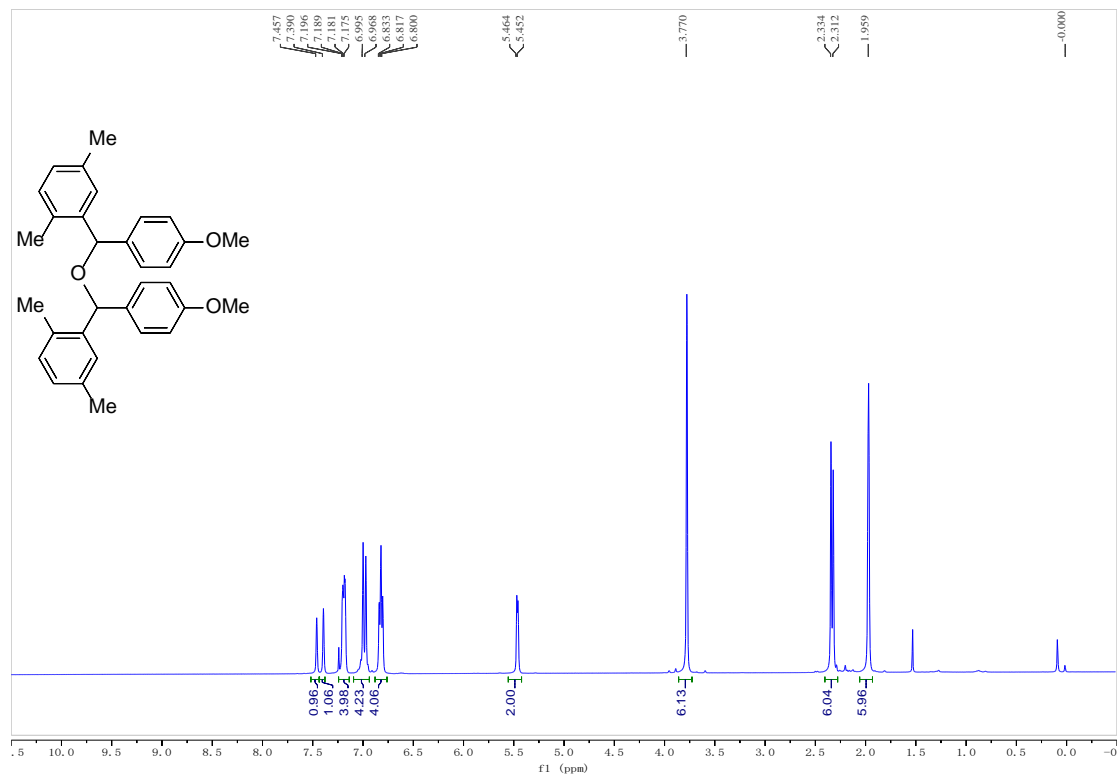 $^{13}\text{C}$  NMR (100 MHz,  $\text{CDCl}_3$ )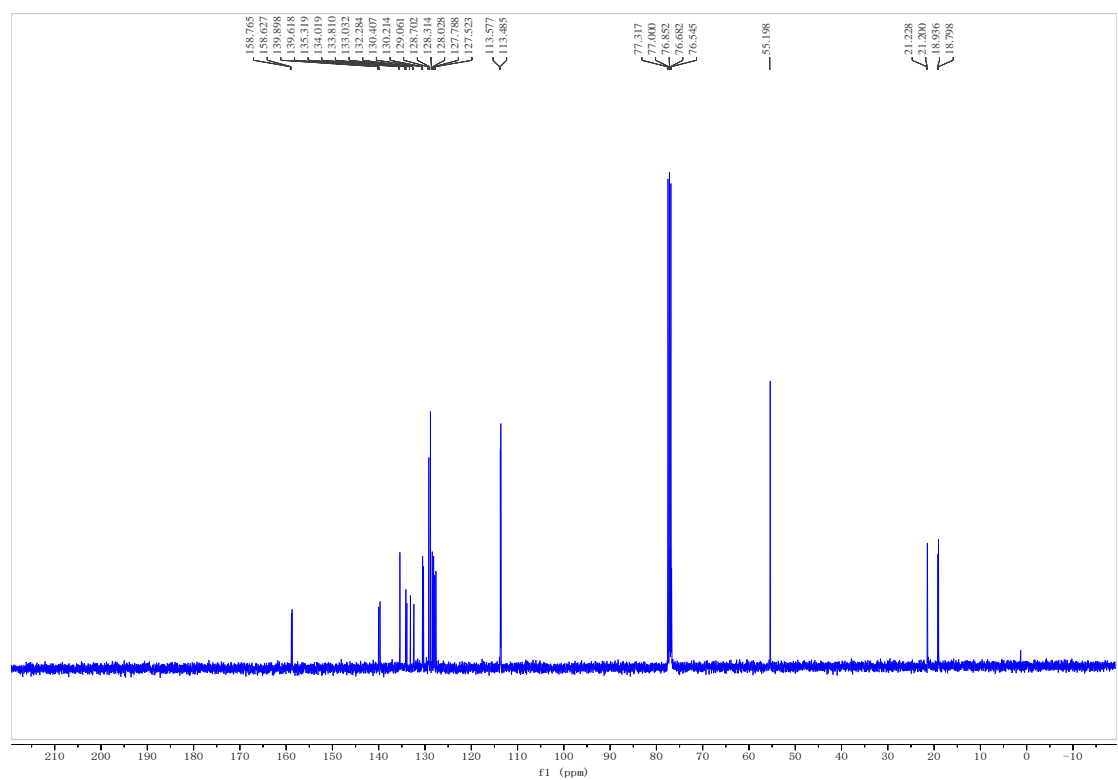

**$^1\text{H}$  and  $^{13}\text{C}$  NMR Spectra for Naproxen:** $^1\text{H}$  NMR (400 MHz,  $\text{CDCl}_3$ )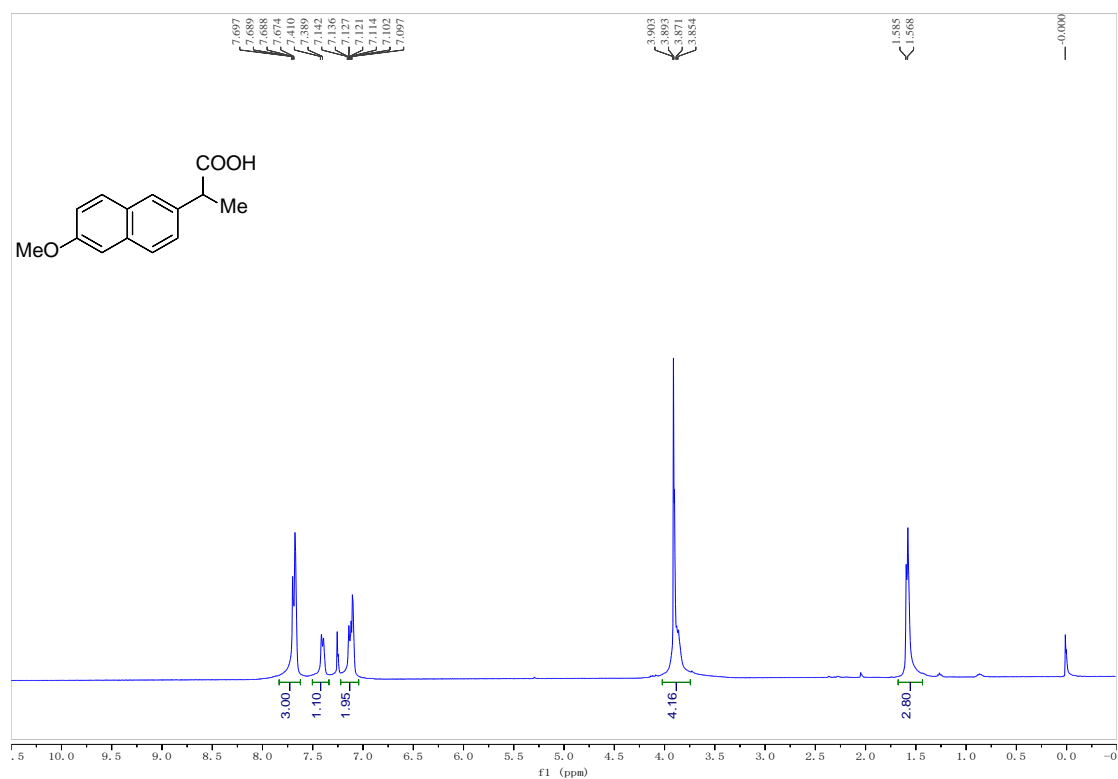 $^{13}\text{C}$  NMR (100 MHz,  $\text{CDCl}_3$ )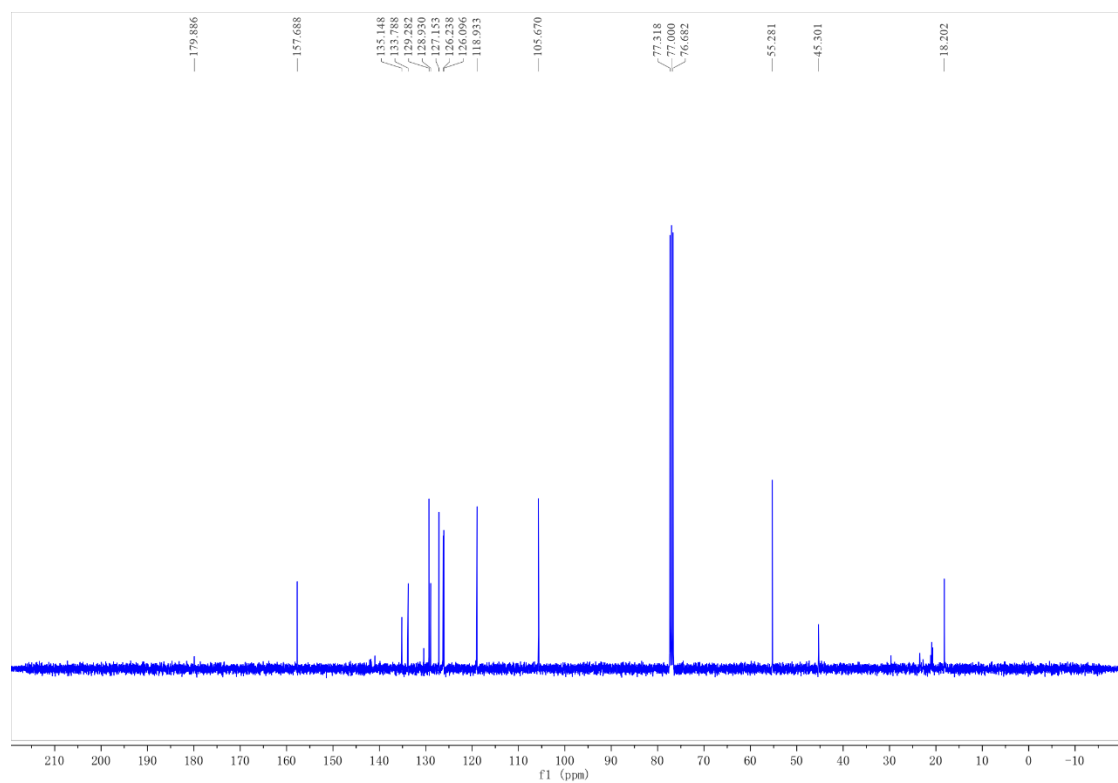

## HPLC spectra:

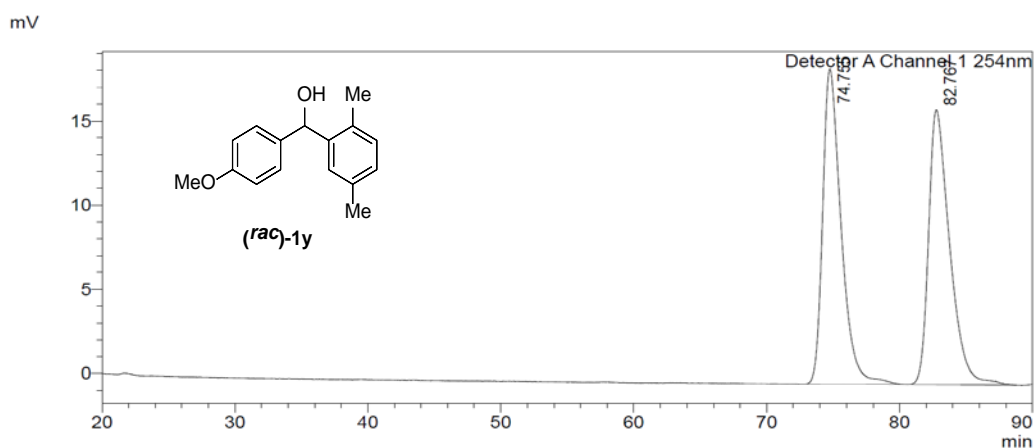

| Peak# | Ret. Time | Area    | Height | Peak Start | Area%   | Width at 50% Height |
|-------|-----------|---------|--------|------------|---------|---------------------|
| 1     | 74.755    | 1807604 | 18687  | 70.250     | 50.017  | 1.427               |
| 2     | 82.767    | 1806407 | 16312  | 80.508     | 49.983  | 1.644               |
| Total |           | 3614011 | 34999  |            | 100.000 |                     |

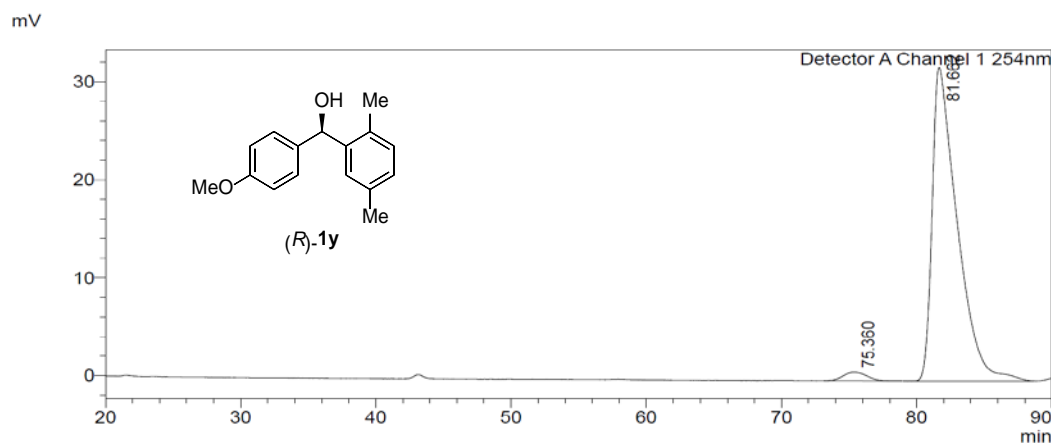

| Peak# | Ret. Time | Area    | Height | Peak Start | Area%   | Width at 50% Height |
|-------|-----------|---------|--------|------------|---------|---------------------|
| 1     | 75.360    | 105570  | 869    | 73.150     | 2.501   | 1.947               |
| 2     | 81.662    | 4115868 | 32019  | 78.992     | 97.499  | 1.905               |
| Total |           | 4221439 | 32888  |            | 100.000 |                     |

95% ee of (*R*)-**1y** was determined by HPLC: OJ-H Column, 5/95 *i*PrOH/hexane, 0.5 mL/min, 254 nm, 35 °C; retention time = 75.36 min (minor), 81.66 min (major).

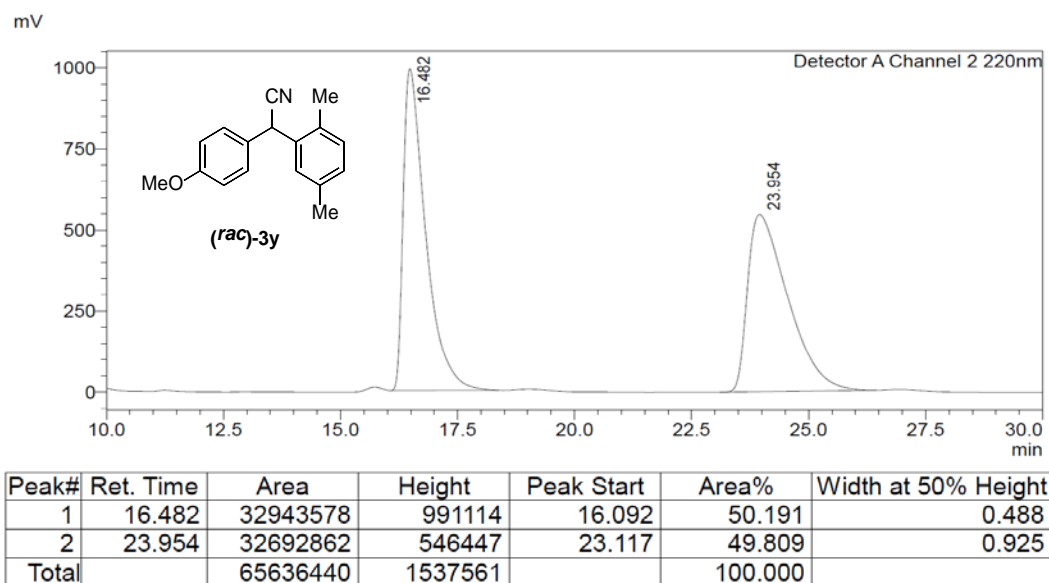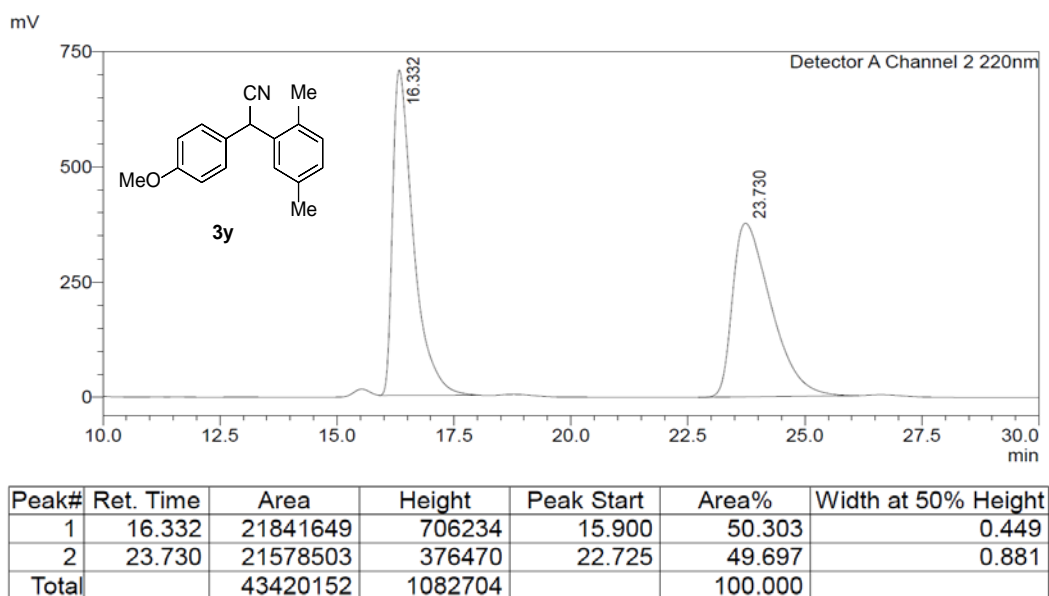

0% ee of **3y** was determined by HPLC: AS-H Column, 5/95 *i*PrOH/hexane, 0.8 mL/min, 220 nm, 35 °C; retention time = 16.33 min (minor), 23.73 min (major)).

**Other Pathways for the Direct Cyanation of Benzyl Alcohols:**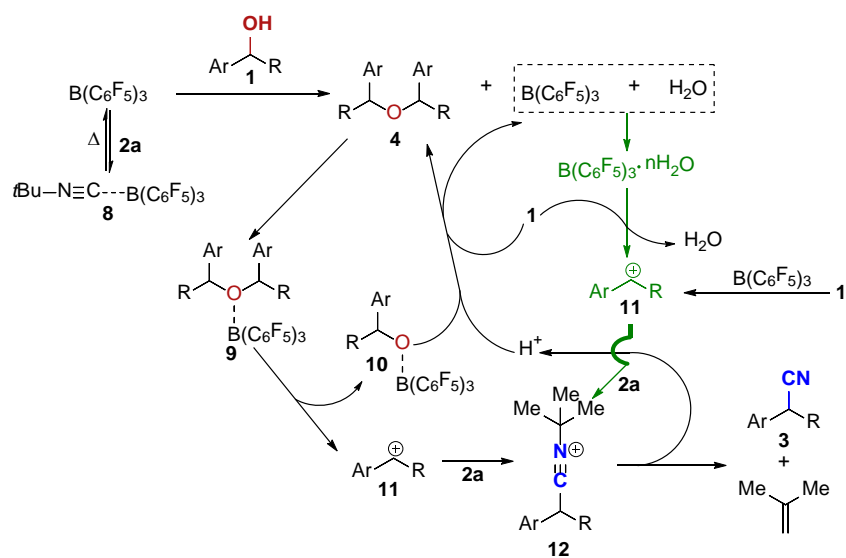**Scheme S1.** Proposed mechanism.
